# Supplementary material for: Development, structural characterization, in vitro release and oral bioavailability studies of novel surface-modified natural Fiber Interlaced Liposomal Vitamin C
Source: Royal Society of Chemistry journal article supplement (doi:10.1039/d4nj03773a), 2024-01-01
Supplement: d4nj03773a1.zip [file d4nj03773a1.zip]

## Sheet: Sheet1
	FTIR
	Fruit fiber			Lecithin			Vitamin C			FIL Vitamin C
	Wave number (cm-1)	Transmittance (%)		Wave number (cm-1)	Transmittance (%)		Wave number (cm-1)	Transmittance (%)		Wave number (cm-1)	Transmittance (%)
	549.736	84.3322		549.736	87.7396		549.736	78.4147		549.736	62.3839
	550.701	83.2351		550.701	86.3197		550.701	76.7121		550.701	63.1662
	551.665	85.8382		551.665	85.9011		551.665	76.7426		551.665	63.4739
	552.629	86.5667		552.629	86.193		552.629	76.2329		552.629	62.1329
	553.594	83.898		553.594	86.4861		553.594	73.3975		553.594	62.1322
	554.558	83.2487		554.558	86.6519		554.558	72.8638		554.558	62.9099
	555.523	85.4148		555.523	85.9209		555.523	74.243		555.523	61.8936
	556.487	86.5109		556.487	85.8411		556.487	74.7162		556.487	62.098
	557.452	85.9508		557.452	85.2		557.452	74.6906		557.452	63.7691
	558.416	85.436		558.416	84.7381		558.416	74.6799		558.416	64.3331
	559.381	85.1311		559.381	85.8393		559.381	74.5251		559.381	63.3536
	560.345	84.5794		560.345	86.1923		560.345	73.1886		560.345	63.1554
	561.31	84.0896		561.31	85.7243		561.31	71.1075		561.31	64.4715
	562.274	83.5028		562.274	86.3208		562.274	70.8996		562.274	64.914
	563.238	82.5035		563.238	84.5321		563.238	71.9839		563.238	63.8335
	564.203	84.5223		564.203	84.9105		564.203	72.6198		564.203	61.1838
	565.167	86.2497		565.167	87.1975		565.167	72.9689		565.167	59.32
	566.132	86.6009		566.132	88.7738		566.132	72.5729		566.132	60.7481
	567.096	85.1633		567.096	88.5955		567.096	71.6234		567.096	62.7175
	568.061	82.9112		568.061	87.2372		568.061	71.5015		568.061	64.0326
	569.025	83.0733		569.025	86.0991		569.025	72.5093		569.025	63.2396
	569.99	84.1463		569.99	85.5285		569.99	76.3257		569.99	63.1959
	570.954	84.0751		570.954	86.7405		570.954	76.8386		570.954	63.6346
	571.918	84.2658		571.918	88.2081		571.918	75.4622		571.918	64.8013
	572.883	84.6015		572.883	86.9142		572.883	73.6485		572.883	64.4929
	573.847	85.7967		573.847	86.5126		573.847	72.9635		573.847	64.1282
	574.812	86.2435		574.812	85.9686		574.812	75.4287		574.812	64.1927
	575.776	87.3926		575.776	86.2745		575.776	78.4996		575.776	64.2984
	576.741	86.8516		576.741	87.0468		576.741	77.9047		576.741	64.9077
	577.705	87.3659		577.705	86.4501		577.705	75.5169		577.705	65.9922
	578.67	87.4723		578.67	85.545		578.67	74.7425		578.67	65.4451
	579.634	86.5189		579.634	85.4243		579.634	76.9942		579.634	63.4739
	580.599	86.7201		580.599	86.152		580.599	78.6336		580.599	62.0751
	581.563	87.5957		581.563	86.7434		581.563	79.459		581.563	62.3693
	582.527	87.4122		582.527	85.9235		582.527	78.8898		582.527	62.7116
	583.492	86.0952		583.492	85.2413		583.492	78.0705		583.492	62.543
	584.456	85.2929		584.456	85.3948		584.456	78.8495		584.456	62.2325
	585.421	85.2724		585.421	85.4259		585.421	79.5187		585.421	61.5453
	586.385	85.0914		586.385	86.0173		586.385	80.3903		586.385	61.1774
	587.35	85.6935		587.35	87.7999		587.35	81.0439		587.35	62.1223
	588.314	85.7604		588.314	88.2786		588.314	80.4614		588.314	62.5276
	589.279	85.6109		589.279	87.3138		589.279	79.3966		589.279	62.4048
	590.243	85.6363		590.243	86.0955		590.243	78.4904		590.243	62.1606
	591.207	85.3962		591.207	86.6002		591.207	78.2487		591.207	61.7242
	592.172	84.7625		592.172	87.0025		592.172	77.7744		592.172	60.9101
	593.136	84.6009		593.136	86.7964		593.136	77.9298		593.136	61.0893
	594.101	83.9359		594.101	86.818		594.101	77.8727		594.101	60.6891
	595.065	83.9551		595.065	86.6655		595.065	78.2017		595.065	61.0242
	596.03	83.2899		596.03	86.3033		596.03	77.8976		596.03	61.7776
	596.994	82.8153		596.994	86.5153		596.994	77.7267		596.994	61.1832
	597.959	83.1388		597.959	86.6063		597.959	77.9775		597.959	60.9082
	598.923	82.8106		598.923	86.3076		598.923	78.6363		598.923	61.4024
	599.888	82.5313		599.888	86.2713		599.888	78.5634		599.888	61.7178
	600.852	83.1059		600.852	86.7759		600.852	78.6168		600.852	61.669
	601.816	83.3953		601.816	87.2921		601.816	78.5499		601.816	61.3553
	602.781	83.0132		602.781	86.6265		602.781	78.5409		602.781	61.5111
	603.745	82.905		603.745	86.073		603.745	78.5788		603.745	61.6323
	604.71	83.0523		604.71	86.2511		604.71	78.7659		604.71	61.8901
	605.674	82.9831		605.674	86.2891		605.674	78.9635		605.674	62.2077
	606.639	83.0422		606.639	86.3506		606.639	79.541		606.639	62.8241
	607.603	82.8325		607.603	86.38		607.603	79.5512		607.603	62.8618
	608.568	83.0308		608.568	86.2344		608.568	79.4616		608.568	62.5597
	609.532	83.5089		609.532	86.5085		609.532	79.874		609.532	62.4564
	610.496	82.9947		610.496	87.2837		610.496	80.1154		610.496	62.8466
	611.461	83.487		611.461	88.0669		611.461	80.5132		611.461	62.4761
	612.425	84.2599		612.425	87.7354		612.425	80.7143		612.425	62.6036
	613.39	84.357		613.39	87.5107		613.39	80.4089		613.39	62.6453
	614.354	83.8987		614.354	87.3661		614.354	80.2918		614.354	62.9171
	615.319	83.4908		615.319	87.5006		615.319	79.9255		615.319	63.0311
	616.283	82.9991		616.283	87.6094		616.283	79.3213		616.283	63.1785
	617.248	82.9188		617.248	87.6376		617.248	79.1863		617.248	62.9136
	618.212	82.7992		618.212	87.8042		618.212	79.0869		618.212	63.4356
	619.176	82.3365		619.176	87.9816		619.176	77.8074		619.176	63.0545
	620.141	82.0829		620.141	87.7977		620.141	77.2205		620.141	62.5713
	621.105	82.2385		621.105	87.8754		621.105	77.0653		621.105	61.662
	622.07	82.4791		622.07	88.0947		622.07	77.0211		622.07	61.0379
	623.034	81.7853		623.034	88.32		623.034	76.0122		623.034	60.9202
	623.999	81.2163		623.999	88.1757		623.999	75.3925		623.999	59.9341
	624.963	81.9091		624.963	87.7648		624.963	74.2208		624.963	58.7363
	625.928	82.8331		625.928	87.742		625.928	72.8416		625.928	58.7133
	626.892	82.4838		626.892	87.7015		626.892	71.3169		626.892	59.0092
	627.857	82.531		627.857	87.5052		627.857	70.0489		627.857	58.356
	628.821	82.7953		628.821	87.7695		628.821	70.0427		628.821	57.7674
	629.785	83.2518		629.785	87.7197		629.785	71.148		629.785	57.5598
	630.75	83.6628		630.75	87.2898		630.75	72.3366		630.75	57.8895
	631.714	84.2239		631.714	87.2954		631.714	73.7184		631.714	58.4707
	632.679	84.2041		632.679	87.5064		632.679	74.8968		632.679	58.6189
	633.643	84.2494		633.643	87.4968		633.643	76.1162		633.643	58.7317
	634.608	84.1038		634.608	87.5488		634.608	76.7908		634.608	58.6739
	635.572	84.0703		635.572	87.5288		635.572	76.9994		635.572	59.01
	636.537	84.3292		636.537	87.4531		636.537	77.0349		636.537	59.4935
	637.501	84.3605		637.501	87.4188		637.501	76.7318		637.501	59.7546
	638.465	84.3896		638.465	87.422		638.465	75.9648		638.465	59.5997
	639.43	84.4903		639.43	87.4065		639.43	75.8053		639.43	59.827
	640.394	84.6896		640.394	87.3735		640.394	76.0646		640.394	59.9665
	641.359	84.95		641.359	87.3355		641.359	76.5416		641.359	60.1211
	642.323	84.7909		642.323	87.3053		642.323	76.338		642.323	60.2206
	643.288	84.8882		643.288	87.4003		643.288	76.2764		643.288	60.0246
	644.252	84.9625		644.252	87.399		644.252	76.2428		644.252	60.1432
	645.217	85.0758		645.217	87.6135		645.217	76.1568		645.217	60.4924
	646.181	85.0825		646.181	87.4775		646.181	75.6894		646.181	60.4403
	647.146	85.3552		647.146	87.2675		647.146	75.411		647.146	60.2737
	648.11	85.5928		648.11	87.2338		648.11	75.1659		648.11	60.0402
	649.074	85.7187		649.074	87.2055		649.074	74.5811		649.074	60.0513
	650.039	85.8437		650.039	87.1949		650.039	74.3278		650.039	60.0485
	651.003	86.013		651.003	87.1863		651.003	74.1607		651.003	59.9671
	651.968	86.2183		651.968	87.168		651.968	74.0745		651.968	59.7911
	652.932	86.3898		652.932	87.1521		652.932	73.8127		652.932	59.7145
	653.897	86.5693		653.897	87.1418		653.897	73.5196		653.897	59.6916
	654.861	86.7193		654.861	87.142		654.861	73.2793		654.861	59.6776
	655.826	86.8333		655.826	87.118		655.826	73.0135		655.826	59.5867
	656.79	86.9791		656.79	87.073		656.79	72.7639		656.79	59.4716
	657.754	87.1278		657.754	87.0324		657.754	72.5063		657.754	59.3676
	658.719	87.2678		658.719	86.9766		658.719	72.2386		658.719	59.2466
	659.683	87.4194		659.683	86.9155		659.683	71.9886		659.683	59.2135
	660.648	87.5915		660.648	86.8625		660.648	71.7467		660.648	59.2597
	661.612	87.7182		661.612	86.8195		661.612	71.4772		661.612	59.1861
	662.577	87.8646		662.577	86.7759		662.577	71.2426		662.577	59.232
	663.541	88.0059		663.541	86.7359		663.541	70.9796		663.541	59.1289
	664.506	88.1397		664.506	86.877		664.506	70.5672		664.506	58.9776
	665.47	88.2757		665.47	87.0382		665.47	70.4507		665.47	59.023
	666.435	88.3828		666.435	86.5566		666.435	70.3149		666.435	59.4308
	667.399	88.4723		667.399	86.4959		667.399	70.087		667.399	59.5342
	668.363	88.5586		668.363	86.4409		668.363	69.8796		668.363	59.6323
	669.328	88.6556		669.328	86.382		669.328	69.6994		669.328	59.6715
	670.292	88.7521		670.292	86.3213		670.292	69.4733		670.292	59.7761
	671.257	88.8379		671.257	86.1909		671.257	68.8629		671.257	60.1318
	672.221	89.1065		672.221	85.8076		672.221	68.6141		672.221	60.7111
	673.186	89.2337		673.186	86.0554		673.186	68.5651		673.186	60.3516
	674.15	89.1825		674.15	85.9534		674.15	68.3807		674.15	60.2568
	675.115	89.2064		675.115	85.7145		675.115	68.1823		675.115	60.3736
	676.079	89.2485		676.079	85.6489		676.079	68.0223		676.079	60.4961
	677.043	89.3071		677.043	85.6751		677.043	67.8385		677.043	60.609
	678.008	89.351		678.008	85.7233		678.008	67.8301		678.008	60.5959
	678.972	89.3805		678.972	85.7293		678.972	67.7477		678.972	60.5632
	679.937	89.4278		679.937	85.7426		679.937	67.7503		679.937	60.7402
	680.901	89.4726		680.901	85.6633		680.901	67.7653		680.901	60.5642
	681.866	89.5204		681.866	85.5658		681.866	67.9766		681.866	60.228
	682.83	89.5407		682.83	85.4794		682.83	68.0723		682.83	59.929
	683.795	89.5905		683.795	85.4286		683.795	67.9909		683.795	60.0008
	684.759	89.7297		684.759	85.3235		684.759	67.9795		684.759	59.9937
	685.723	89.798		685.723	85.3031		685.723	68.1771		685.723	60.0544
	686.688	89.614		686.688	85.3347		686.688	68.4749		686.688	60.0071
	687.652	89.5746		687.652	85.3881		687.652	68.743		687.652	60.2516
	688.617	89.5687		688.617	85.3646		688.617	69.1407		688.617	60.3904
	689.581	89.5743		689.581	85.3347		689.581	69.3913		689.581	60.4721
	690.546	89.5894		690.546	85.2927		690.546	69.6413		690.546	60.4826
	691.51	89.6034		691.51	85.2472		691.51	70.0497		691.51	60.5085
	692.475	89.6136		692.475	85.3579		692.475	70.4409		692.475	60.6747
	693.439	89.558		693.439	85.2718		693.439	70.7507		693.439	60.8245
	694.404	89.5286		694.404	85.1965		694.404	71.055		694.404	60.8684
	695.368	89.5082		695.368	85.2031		695.368	71.325		695.368	60.9606
	696.332	89.5088		696.332	85.1901		696.332	71.6231		696.332	61.1172
	697.297	89.4839		697.297	85.1206		697.297	71.916		697.297	61.26
	698.261	89.4605		698.261	85.0917		698.261	72.1959		698.261	61.2427
	699.226	89.4478		699.226	85.2388		699.226	72.5666		699.226	61.2343
	700.19	89.4386		700.19	85.2289		700.19	72.8703		700.19	61.2339
	701.155	89.3737		701.155	85.1821		701.155	73.0774		701.155	61.363
	702.119	89.2936		702.119	85.0668		702.119	73.0738		702.119	61.4111
	703.084	89.3557		703.084	84.9206		703.084	73.2055		703.084	61.4586
	704.048	89.3371		704.048	84.8289		704.048	73.3702		704.048	61.4984
	705.012	89.3103		705.012	84.7729		705.012	73.3943		705.012	61.5264
	705.977	89.2865		705.977	84.7414		705.977	73.4837		705.977	61.6609
	706.941	89.2766		706.941	84.8202		706.941	73.5613		706.941	61.8556
	707.906	89.2778		707.906	84.723		707.906	73.5943		707.906	61.8347
	708.87	89.3061		708.87	84.5945		708.87	73.5506		708.87	61.7659
	709.835	89.2682		709.835	84.3553		709.835	73.1279		709.835	61.7165
	710.799	89.2063		710.799	84.2127		710.799	72.5781		710.799	61.543
	711.764	89.2402		711.764	84.1875		711.764	71.9738		711.764	61.3711
	712.728	89.226		712.728	84.2137		712.728	71.233		712.728	61.1725
	713.693	89.1996		713.693	84.247		713.693	70.5834		713.693	61.0176
	714.657	88.9925		714.657	84.2455		714.657	70.4596		714.657	61.0282
	715.621	89.0478		715.621	84.1658		715.621	70.7822		715.621	60.8938
	716.586	89.1353		716.586	84.0674		716.586	71.0735		716.586	60.6653
	717.55	89.1276		717.55	83.9127		717.55	70.9103		717.55	60.674
	718.515	89.2093		718.515	83.86		718.515	70.6549		718.515	60.5701
	719.479	89.2257		719.479	84.1239		719.479	70.4122		719.479	60.8754
	720.444	89.233		720.444	84.1742		720.444	70.111		720.444	61.0092
	721.408	89.2358		721.408	84.0652		721.408	70.0283		721.408	60.8537
	722.373	89.1662		722.373	83.6457		722.373	70.2548		722.373	60.4086
	723.337	89.2291		723.337	83.7001		723.337	70.994		723.337	60.341
	724.301	89.2698		724.301	83.8185		724.301	71.6802		724.301	60.6423
	725.266	89.2802		725.266	84.0108		725.266	72.2595		725.266	60.9285
	726.23	89.2928		726.23	84.1655		726.23	72.6306		726.23	61.016
	727.195	89.3147		727.195	84.4575		727.195	72.812		727.195	61.2359
	728.159	89.3385		728.159	84.7174		728.159	72.9317		728.159	61.5089
	729.124	89.3632		729.124	84.8396		729.124	72.9924		729.124	61.7709
	730.088	89.3809		730.088	84.9446		730.088	73.0476		730.088	61.9741
	731.053	89.394		731.053	85.0545		731.053	73.2274		731.053	62.2006
	732.017	89.4111		732.017	85.201		732.017	73.3575		732.017	62.5004
	732.982	89.4267		732.982	85.3654		732.982	73.3663		732.982	62.7703
	733.946	89.446		733.946	85.4574		733.946	73.4355		733.946	63.0848
	734.91	89.473		734.91	85.6209		734.91	73.499		734.91	63.4377
	735.875	89.4968		735.875	85.7302		735.875	73.6278		735.875	63.7993
	736.839	89.5264		736.839	85.7613		736.839	73.7396		736.839	64.0211
	737.804	89.5618		737.804	85.8929		737.804	73.7798		737.804	64.2179
	738.768	89.6209		738.768	86.0967		738.768	73.9241		738.768	64.4068
	739.733	89.6071		739.733	86.3035		739.733	74.0257		739.733	64.6228
	740.697	89.5959		740.697	86.4411		740.697	74.1257		740.697	64.9471
	741.662	89.705		741.662	86.4409		741.662	74.2505		741.662	65.0806
	742.626	89.6178		742.626	86.5009		742.626	74.1894		742.626	64.9424
	743.59	89.4848		743.59	86.648		743.59	73.9054		743.59	64.8237
	744.555	89.5966		744.555	86.7528		744.555	73.2668		744.555	64.6282
	745.519	89.7227		745.519	86.9168		745.519	72.1085		745.519	64.4515
	746.484	89.8491		746.484	86.919		746.484	70.6145		746.484	63.9869
	747.448	89.895		747.448	86.797		747.448	69.201		747.448	63.3144
	748.413	89.799		748.413	86.707		748.413	68.0896		748.413	62.6869
	749.377	89.873		749.377	86.6881		749.377	67.3323		749.377	61.9852
	750.342	89.9151		750.342	86.6931		750.342	66.7598		750.342	61.2715
	751.306	89.8637		751.306	86.8266		751.306	65.9755		751.306	60.4206
	752.27	89.8212		752.27	86.8966		752.27	64.8203		752.27	59.1215
	753.235	89.9097		753.235	86.7577		753.235	63.562		753.235	57.4581
	754.199	89.9932		754.199	86.7752		754.199	62.6954		754.199	55.7756
	755.164	89.9934		755.164	86.9213		755.164	62.6485		755.164	54.7993
	756.128	90.0249		756.128	86.9334		756.128	63.5586		756.128	54.3699
	757.093	89.8932		757.093	86.8605		757.093	65.0087		757.093	54.3449
	758.057	89.8148		758.057	86.778		758.057	66.6474		758.057	54.5226
	759.022	89.8716		759.022	86.7201		759.022	68.1891		759.022	55.1327
	759.986	89.8998		759.986	86.7841		759.986	69.5723		759.986	56.1245
	760.951	89.9107		760.951	86.8782		760.951	70.943		760.951	57.1712
	761.915	89.876		761.915	86.8773		761.915	72.0987		761.915	58.3633
	762.879	89.8854		762.879	86.8902		762.879	73.2989		762.879	59.6707
	763.844	90.0015		763.844	86.8549		763.844	74.3087		763.844	61.0838
	764.808	89.7978		764.808	86.8106		764.808	75.0215		764.808	62.5272
	765.773	89.5734		765.773	86.9413		765.773	75.8377		765.773	63.7402
	766.737	89.4925		766.737	87.0911		766.737	76.5779		766.737	64.8765
	767.702	89.4836		767.702	87.112		767.702	77.3106		767.702	65.9263
	768.666	89.3045		768.666	87.0052		768.666	77.9331		768.666	66.774
	769.631	88.9836		769.631	86.9263		769.631	78.2432		769.631	67.5121
	770.595	88.7396		770.595	86.9715		770.595	78.5879		770.595	68.0648
	771.559	88.5228		771.559	87.0689		771.559	78.9899		771.559	68.5063
	772.524	88.2684		772.524	87.2179		772.524	79.2237		772.524	68.8246
	773.488	87.9928		773.488	87.5145		773.488	79.4269		773.488	69.0512
	774.453	87.98		774.453	87.717		774.453	79.7255		774.453	69.4895
	775.417	88.0245		775.417	87.7181		775.417	80.0524		775.417	69.8168
	776.382	88.044		776.382	87.7955		776.382	80.1159		776.382	70.0766
	777.346	88.2741		777.346	88.0215		777.346	80.1084		777.346	70.2198
	778.311	88.8424		778.311	88.0932		778.311	80.1967		778.311	70.4259
	779.275	89.5255		779.275	88.0623		779.275	80.3665		779.275	70.6612
	780.24	90.1219		780.24	88.2841		780.24	80.5745		780.24	70.825
	781.204	90.7039		781.204	88.3941		781.204	80.743		781.204	70.9767
	782.168	91.2827		782.168	88.514		782.168	80.864		782.168	71.1762
	783.133	91.6768		783.133	88.6647		783.133	80.9527		783.133	71.3694
	784.097	91.8503		784.097	88.5819		784.097	80.9593		784.097	71.5916
	785.062	92.076		785.062	88.6157		785.062	81.0107		785.062	71.6555
	786.026	92.1544		786.026	88.6937		786.026	81.209		786.026	71.7226
	786.991	92.1253		786.991	88.6398		786.991	81.243		786.991	72.0352
	787.955	92.2968		787.955	88.7001		787.955	81.4316		787.955	72.2398
	788.92	92.5162		788.92	88.6858		788.92	81.7521		788.92	72.2812
	789.884	92.6054		789.884	88.6607		789.884	82.0438		789.884	72.4715
	790.848	92.6649		790.848	88.6702		790.848	82.2046		790.848	72.6287
	791.813	92.7444		791.813	88.6704		791.813	82.3172		791.813	72.6702
	792.777	92.7685		792.777	88.5348		792.777	82.459		792.777	72.7528
	793.742	92.9272		793.742	88.3105		793.742	82.7439		793.742	72.9703
	794.706	93.0454		794.706	88.2261		794.706	83.0865		794.706	73.1331
	795.671	93.0456		795.671	88.214		795.671	83.4584		795.671	73.162
	796.635	92.9688		796.635	87.9955		796.635	83.7287		796.635	73.0906
	797.6	92.9434		797.6	87.7858		797.6	83.832		797.6	73.0279
	798.564	92.9608		798.564	87.7423		798.564	83.9307		798.564	72.935
	799.529	92.9838		799.529	87.6663		799.529	84.1475		799.529	73.0144
	800.493	93.0173		800.493	87.5344		800.493	84.3403		800.493	73.0284
	801.457	93.0025		801.457	87.4493		801.457	84.5004		801.457	72.8771
	802.422	93.0036		802.422	87.3181		802.422	84.62		802.422	72.7352
	803.386	92.9748		803.386	87.1252		803.386	84.7105		803.386	72.6815
	804.351	92.9057		804.351	87.0453		804.351	84.7693		804.351	72.592
	805.315	92.913		805.315	87.053		805.315	84.7919		805.315	72.3861
	806.28	92.9267		806.28	87.0766		806.28	84.7709		806.28	72.1656
	807.244	92.8877		807.244	87.0941		807.244	84.6742		807.244	72.1098
	808.209	93.0161		808.209	86.9335		808.209	84.668		808.209	71.9431
	809.173	93.0493		809.173	86.7667		809.173	84.6169		809.173	71.7368
	810.137	93.1081		810.137	86.6359		810.137	84.4157		810.137	71.4768
	811.102	93.1828		811.102	86.5197		811.102	84.2769		811.102	71.1239
	812.066	92.9937		812.066	86.3924		812.066	83.839		812.066	70.6213
	813.031	92.96		813.031	86.1933		813.031	83.1849		813.031	70.4285
	813.995	93.0781		813.995	86.0955		813.995	82.5322		813.995	70.0417
	814.96	93.1106		814.96	86.2197		814.96	81.4101		814.96	69.272
	815.924	93.1176		815.924	86.1715		815.924	79.5534		815.924	68.6221
	816.889	93.1453		816.889	86.0552		816.889	76.9239		816.889	67.8443
	817.853	93.1653		817.853	86.0765		817.853	73.5425		817.853	66.6181
	818.818	92.987		818.818	86.0947		818.818	70.193		818.818	65.2639
	819.782	92.8946		819.782	85.9586		819.782	67.9742		819.782	63.9223
	820.746	92.9841		820.746	85.8273		820.746	68.1559		820.746	63.4262
	821.711	93.0417		821.711	85.7609		821.711	70.57		821.711	63.9725
	822.675	92.8688		822.675	85.7124		822.675	74.1971		822.675	65.0299
	823.64	92.7033		823.64	85.7578		823.64	77.6353		823.64	65.9298
	824.604	92.6108		824.604	85.7644		824.604	80.2015		824.604	66.6284
	825.569	92.5271		825.569	85.7456		825.569	81.8379		825.569	67.1069
	826.533	92.4673		826.533	85.8551		826.533	82.9014		826.533	67.5881
	827.498	92.3324		827.498	85.8544		827.498	83.728		827.498	68.2173
	828.462	92.1639		828.462	85.8134		828.462	84.3103		828.462	68.647
	829.426	91.9543		829.426	85.8124		829.426	84.6505		829.426	68.8494
	830.391	91.7289		830.391	86.0103		830.391	84.9519		830.391	69.1145
	831.355	91.5293		831.355	86.2888		831.355	85.287		831.355	69.4815
	832.32	91.3971		832.32	86.4663		832.32	85.499		832.32	70.0077
	833.284	91.1968		833.284	86.5252		833.284	85.4525		833.284	70.5734
	834.249	90.7838		834.249	86.5801		834.249	85.3533		834.249	71.1831
	835.213	90.136		835.213	86.7899		835.213	85.3608		835.213	71.7715
	836.178	89.3455		836.178	87.037		836.178	85.3964		836.178	72.2696
	837.142	88.7273		837.142	87.1606		837.142	85.4143		837.142	72.5727
	838.106	88.3927		838.106	87.2439		838.106	85.4774		838.106	72.7456
	839.071	88.4997		839.071	87.3966		839.071	85.5065		839.071	72.9337
	840.035	89.2586		840.035	87.6366		840.035	85.521		840.035	73.0081
	841	90.1767		841	87.8939		841	85.5336		841	73.0091
	841.964	91.0772		841.964	88.0983		841.964	85.4638		841.964	72.9351
	842.929	91.7834		842.929	88.2402		842.929	85.4704		842.929	72.8693
	843.893	92.2951		843.893	88.3329		843.893	85.5557		843.893	72.8504
	844.858	92.4754		844.858	88.2983		844.858	85.5106		844.858	72.7958
	845.822	92.6636		845.822	88.4642		845.822	85.564		845.822	72.9013
	846.787	92.8413		846.787	88.6633		846.787	85.5131		846.787	72.848
	847.751	92.9579		847.751	88.7923		847.751	85.5154		847.751	72.7101
	848.715	92.977		848.715	88.8535		848.715	85.5234		848.715	72.6848
	849.68	93.0525		849.68	88.9805		849.68	85.4868		849.68	72.6385
	850.644	93.1665		850.644	89.0574		850.644	85.4371		850.644	72.5501
	851.609	93.2379		851.609	89.0023		851.609	85.4012		851.609	72.6095
	852.573	93.2911		852.573	89.081		852.573	85.3947		852.573	72.6497
	853.538	93.3726		853.538	89.2146		853.538	85.4134		853.538	72.6476
	854.502	93.4979		854.502	89.1816		854.502	85.3778		854.502	72.7023
	855.467	93.5798		855.467	89.3371		855.467	85.1403		855.467	72.7131
	856.431	93.5925		856.431	89.5603		856.431	84.849		856.431	72.6002
	857.395	93.689		857.395	89.6827		857.395	84.5942		857.395	72.4298
	858.36	93.6981		858.36	89.7874		858.36	84.3719		858.36	72.1139
	859.324	93.5587		859.324	89.8423		859.324	83.9625		859.324	71.8239
	860.289	93.5285		860.289	89.8912		860.289	83.5534		860.289	71.6044
	861.253	93.6146		861.253	89.9482		861.253	83.1269		861.253	71.3718
	862.218	93.613		862.218	89.9198		862.218	82.48		862.218	70.9688
	863.182	93.5368		863.182	89.9544		863.182	81.7246		863.182	70.6244
	864.147	93.4573		864.147	90.0238		864.147	80.9208		864.147	70.1935
	865.111	93.4377		865.111	90.0233		865.111	79.8428		865.111	69.651
	866.076	93.4789		866.076	90.0221		866.076	78.5918		866.076	69.1002
	867.04	93.4558		867.04	89.9468		867.04	77.293		867.04	68.4432
	868.004	93.3463		868.004	89.8788		868.004	75.945		868.004	67.7849
	868.969	93.3555		868.969	89.8079		868.969	75.0704		868.969	67.2376
	869.933	93.3922		869.933	89.6957		869.933	75.0762		869.933	66.8436
	870.898	93.3779		870.898	89.498		870.898	76.0571		870.898	66.7233
	871.862	93.3055		871.862	89.3601		871.862	77.916		871.862	66.9408
	872.827	93.2157		872.827	89.3448		872.827	80.4102		872.827	67.3968
	873.791	93.2333		873.791	89.4564		873.791	82.9312		873.791	67.9017
	874.756	93.253		874.756	89.6031		874.756	85.0367		874.756	68.34
	875.72	93.2398		875.72	89.6942		875.72	86.5065		875.72	68.7204
	876.684	93.202		876.684	89.8394		876.684	87.5566		876.684	69.2072
	877.649	93.0988		877.649	90.09		877.649	88.2743		877.649	69.6561
	878.613	92.9724		878.613	90.4592		878.613	88.599		878.613	70.0049
	879.578	92.9607		879.578	90.7213		879.578	88.7681		879.578	70.2302
	880.542	93.0316		880.542	90.9195		880.542	89.1163		880.542	70.4149
	881.507	93.0505		881.507	91.1186		881.507	89.4557		881.507	70.6534
	882.471	92.9899		882.471	91.3277		882.471	89.4794		882.471	71.0317
	883.436	92.9431		883.436	91.499		883.436	89.3941		883.436	71.4001
	884.4	92.8984		884.4	91.5042		884.4	89.3604		884.4	71.5423
	885.365	92.9179		885.365	91.5618		885.365	89.3073		885.365	71.7105
	886.329	92.9414		886.329	91.6572		886.329	89.2698		886.329	71.9766
	887.293	92.7977		887.293	91.6959		887.293	89.1678		887.293	72.2004
	888.258	92.6396		888.258	91.7108		888.258	89.1752		888.258	72.4618
	889.222	92.6828		889.222	91.7483		889.222	89.2683		889.222	72.7173
	890.187	92.7139		890.187	91.7828		890.187	89.1823		890.187	72.8619
	891.151	92.6078		891.151	91.772		891.151	89.1222		891.151	73.0169
	892.116	92.6666		892.116	91.7903		892.116	89.1733		892.116	73.1724
	893.08	92.7125		893.08	91.768		893.08	89.0402		893.08	73.2189
	894.045	92.5823		894.045	91.6706		894.045	88.8971		894.045	73.4025
	895.009	92.6722		895.009	91.5642		895.009	88.9309		895.009	73.6281
	895.973	92.7309		895.973	91.5918		895.973	88.954		895.973	73.7686
	896.938	92.576		896.938	91.6282		896.938	88.8615		896.938	73.7299
	897.902	92.4824		897.902	91.5406		897.902	88.7784		897.902	73.7035
	898.867	92.4993		898.867	91.4022		898.867	88.7173		898.867	73.7985
	899.831	92.5156		899.831	91.3905		899.831	88.7019		899.831	73.8414
	900.796	92.4055		900.796	91.3423		900.796	88.7141		900.796	73.7334
	901.76	92.3045		901.76	91.119		901.76	88.7264		901.76	73.5513
	902.725	92.2337		902.725	90.9027		902.725	88.6212		902.725	73.3659
	903.689	92.0316		903.689	90.7716		903.689	88.4996		903.689	73.1616
	904.654	91.8848		904.654	90.707		904.654	88.4671		904.654	72.9062
	905.618	91.784		905.618	90.5832		905.618	88.4013		905.618	72.7109
	906.582	91.5494		906.582	90.3927		906.582	88.2419		906.582	72.6193
	907.547	91.2754		907.547	90.1133		907.547	88.1854		907.547	72.4712
	908.511	90.949		908.511	89.7364		908.511	88.0805		908.511	72.1609
	909.476	90.7247		909.476	89.4909		909.476	88.0471		909.476	71.8892
	910.44	90.4317		910.44	89.3568		910.44	88.1017		910.44	71.6194
	911.405	90.036		911.405	89.1628		911.405	88.1125		911.405	71.4155
	912.369	89.4771		912.369	89.0469		912.369	88.008		912.369	71.188
	913.334	88.8786		913.334	88.9156		913.334	87.928		913.334	70.9907
	914.298	88.222		914.298	88.7265		914.298	87.6941		914.298	70.7954
	915.262	87.8963		915.262	88.5729		915.262	87.5859		915.262	70.5532
	916.227	88.0489		916.227	88.4645		916.227	87.6425		916.227	70.2172
	917.191	88.4074		917.191	88.2951		917.191	87.6118		917.191	70.0104
	918.156	89.025		918.156	88.103		918.156	87.5883		918.156	69.8647
	919.12	89.8083		919.12	87.9548		919.12	87.4986		919.12	69.7023
	920.085	90.5337		920.085	87.8651		920.085	87.4025		920.085	69.4336
	921.049	91.1768		921.049	87.8088		921.049	87.3299		921.049	69.2608
	922.014	91.633		922.014	87.7068		922.014	87.2633		922.014	69.0639
	922.978	92.0023		922.978	87.6013		922.978	87.3115		922.978	68.8296
	923.942	92.2412		923.942	87.5061		923.942	87.3138		923.942	68.7095
	924.907	92.31		924.907	87.4247		924.907	87.1708		924.907	68.5954
	925.871	92.4113		925.871	87.3388		925.871	87.0099		925.871	68.5189
	926.836	92.4422		926.836	87.3433		926.836	86.9591		926.836	68.4035
	927.8	92.3701		927.8	87.3625		927.8	86.7974		927.8	68.3009
	928.765	92.4796		928.765	87.4078		928.765	86.7507		928.765	68.341
	929.729	92.6125		929.729	87.4981		929.729	86.7932		929.729	68.3356
	930.694	92.7399		930.694	87.6209		930.694	86.745		930.694	68.3829
	931.658	92.6912		931.658	87.715		931.658	86.5999		931.658	68.4963
	932.623	92.6432		932.623	87.8535		932.623	86.5482		932.623	68.612
	933.587	92.7019		933.587	87.9447		933.587	86.4961		933.587	68.7666
	934.551	92.6927		934.551	87.9357		934.551	86.4291		934.551	69.0482
	935.516	92.6301		935.516	88.029		935.516	86.4039		935.516	69.2733
	936.48	92.5871		936.48	88.2395		936.48	86.2882		936.48	69.4043
	937.445	92.5289		937.445	88.2719		937.445	86.0901		937.445	69.5373
	938.409	92.472		938.409	88.2504		938.409	86.0258		938.409	69.6368
	939.374	92.2854		939.374	88.2765		939.374	85.9205		939.374	69.6887
	940.338	92.0913		940.338	88.1618		940.338	85.816		940.338	69.6632
	941.303	92.0329		941.303	87.9532		941.303	85.7315		941.303	69.6239
	942.267	92.0151		942.267	87.735		942.267	85.6592		942.267	69.499
	943.231	91.9176		943.231	87.6538		943.231	85.608		943.231	69.3007
	944.196	91.8187		944.196	87.4615		944.196	85.5534		944.196	69.0596
	945.16	91.7547		945.16	87.1532		945.16	85.4892		945.16	68.7742
	946.125	91.6455		946.125	86.8339		946.125	85.3489		946.125	68.5143
	947.089	91.4008		947.089	86.4313		947.089	85.1644		947.089	68.0217
	948.054	91.3031		948.054	86.0099		948.054	85.106		948.054	67.519
	949.018	91.1382		949.018	85.6138		949.018	85.0301		949.018	67.079
	949.983	90.8776		949.983	85.2231		949.983	84.8474		949.983	66.6178
	950.947	90.6901		950.947	84.92		950.947	84.7203		950.947	66.1633
	951.912	90.558		951.912	84.6535		951.912	84.5958		951.912	65.8457
	952.876	90.53		952.876	84.424		952.876	84.5175		952.876	65.4411
	953.84	90.4628		953.84	84.2619		953.84	84.4442		953.84	65.0262
	954.805	90.2454		954.805	84.141		954.805	84.3002		954.805	64.6938
	955.769	90.0963		955.769	84.0521		955.769	84.1072		955.769	64.4488
	956.734	90.0323		956.734	83.9652		956.734	83.9378		956.734	64.0552
	957.698	89.9742		957.698	83.8969		957.698	83.8318		957.698	63.604
	958.663	89.9037		958.663	83.7661		958.663	83.6706		958.663	63.0723
	959.627	89.8165		959.627	83.518		959.627	83.568		959.627	62.5464
	960.592	89.7465		960.592	83.2117		960.592	83.4683		960.592	61.8954
	961.556	89.5509		961.556	82.7285		961.556	83.2043		961.556	61.1571
	962.52	89.343		962.52	82.1247		962.52	83.0062		962.52	60.482
	963.485	89.2431		963.485	81.4613		963.485	82.8991		963.485	59.9021
	964.449	89.0917		964.449	80.9071		964.449	82.5837		964.449	59.19
	965.414	88.9194		965.414	80.5255		965.414	82.3418		965.414	58.509
	966.378	88.8828		966.378	80.1544		966.378	82.1977		966.378	57.8419
	967.343	88.6738		967.343	79.8194		967.343	81.9141		967.343	57.263
	968.307	88.3108		968.307	79.5846		968.307	81.5277		968.307	56.7392
	969.272	88.2013		969.272	79.5704		969.272	81.2505		969.272	56.1858
	970.236	88.1424		970.236	79.6308		970.236	80.9859		970.236	55.6327
	971.201	87.9399		971.201	79.8488		971.201	80.5232		971.201	55.243
	972.165	87.7227		972.165	80.1389		972.165	80.0741		972.165	54.9811
	973.129	87.6106		973.129	80.4782		973.129	79.7559		973.129	54.7493
	974.094	87.4582		974.094	80.9985		974.094	79.3286		974.094	54.5443
	975.058	87.2125		975.058	81.5566		975.058	78.7721		975.058	54.4196
	976.023	86.9041		976.023	82.0032		976.023	78.1441		976.023	54.3752
	976.987	86.6404		976.987	82.562		976.987	77.5424		976.987	54.3271
	977.952	86.3791		977.952	83.0721		977.952	76.8902		977.952	54.3171
	978.916	86.083		978.916	83.4031		978.916	76.2062		978.916	54.3644
	979.881	85.7298		979.881	83.7441		979.881	75.4001		979.881	54.2257
	980.845	85.3929		980.845	84.0765		980.845	74.4355		980.845	54.0996
	981.809	84.9175		981.809	84.3843		981.809	73.2938		981.809	53.9941
	982.774	84.3504		982.774	84.5591		982.774	71.9353		982.774	53.7499
	983.738	83.715		983.738	84.7014		983.738	70.4154		983.738	53.3952
	984.703	83.0844		984.703	84.8132		984.703	68.8507		984.703	52.983
	985.667	82.4551		985.667	84.745		985.667	67.2643		985.667	52.4193
	986.632	81.7786		986.632	84.6961		986.632	65.6448		986.632	51.6842
	987.596	81.1232		987.596	84.7169		987.596	64.2662		987.596	50.7368
	988.561	80.5085		988.561	84.7234		988.561	63.6513		988.561	49.9666
	989.525	79.773		989.525	84.6938		989.525	64.4047		989.525	49.589
	990.489	79.1017		990.489	84.6667		990.489	66.7222		990.489	49.772
	991.454	78.494		991.454	84.6429		991.454	70.173		991.454	50.4607
	992.418	77.9675		992.418	84.5943		992.418	74.0539		992.418	51.3593
	993.383	77.5641		993.383	84.6376		993.383	77.4198		993.383	51.9948
	994.347	77.3781		994.347	84.6286		994.347	79.7643		994.347	52.2741
	995.312	77.4377		995.312	84.5874		995.312	81.1096		995.312	52.096
	996.276	77.7397		996.276	84.5531		996.276	81.8895		996.276	51.7612
	997.241	78.1128		997.241	84.4457		997.241	82.4877		997.241	51.2949
	998.205	78.4077		998.205	84.3934		998.205	82.9588		998.205	50.7212
	999.17	78.6188		999.17	84.3479		999.17	83.1667		999.17	49.9854
	1000.13	78.7728		1000.13	84.3843		1000.13	83.1513		1000.13	49.204
	1001.1	78.8767		1001.1	84.3893		1001.1	82.8578		1001.1	48.3485
	1002.06	79.0974		1002.06	84.3473		1002.06	82.4112		1002.06	47.4834
	1003.03	79.4304		1003.03	84.2699		1003.03	81.8627		1003.03	46.6418
	1003.99	79.905		1003.99	84.1887		1003.99	81.1524		1003.99	45.7476
	1004.96	80.3742		1004.96	84.1943		1004.96	80.2291		1004.96	44.8026
	1005.92	80.6876		1005.92	84.2832		1005.92	79.1999		1005.92	43.9359
	1006.89	80.7925		1006.89	84.2545		1006.89	77.908		1006.89	43.0932
	1007.85	80.7271		1007.85	84.0888		1007.85	76.4115		1007.85	42.3251
	1008.81	80.3851		1008.81	83.8114		1008.81	75.1929		1008.81	41.6373
	1009.78	79.9136		1009.78	83.7005		1009.78	74.4748		1009.78	41.1283
	1010.74	79.3877		1010.74	83.6149		1010.74	73.8803		1010.74	40.6569
	1011.71	78.7695		1011.71	83.5111		1011.71	73.0803		1011.71	40.2626
	1012.67	78.1826		1012.67	83.3769		1012.67	71.9588		1012.67	39.8308
	1013.64	77.807		1013.64	83.258		1013.64	70.6009		1013.64	39.5265
	1014.6	77.7936		1014.6	83.1036		1014.6	69.0306		1014.6	39.2983
	1015.57	78.0095		1015.57	83.0888		1015.57	67.2271		1015.57	39.1156
	1016.53	78.1292		1016.53	83.1002		1016.53	65.1063		1016.53	38.8853
	1017.49	77.9355		1017.49	83.0167		1017.49	62.8304		1017.49	38.5795
	1018.46	77.5594		1018.46	82.8703		1018.46	60.508		1018.46	38.221
	1019.42	77.2658		1019.42	82.8118		1019.42	58.1333		1019.42	37.8673
	1020.39	77.0912		1020.39	82.7132		1020.39	55.6292		1020.39	37.3915
	1021.35	77.1158		1021.35	82.5552		1021.35	53.2547		1021.35	36.7943
	1022.32	77.2379		1022.32	82.4181		1022.32	51.2287		1022.32	35.975
	1023.28	77.5214		1023.28	82.3632		1023.28	50.0097		1023.28	35.227
	1024.25	77.9737		1024.25	82.1667		1024.25	49.9767		1024.25	34.9169
	1025.21	78.5347		1025.21	81.9065		1025.21	51.0354		1025.21	35.4468
	1026.17	79.1506		1026.17	81.4963		1026.17	52.8168		1026.17	36.4489
	1027.14	79.7504		1027.14	81.1944		1027.14	55.1103		1027.14	37.3921
	1028.1	80.3628		1028.1	81.0071		1028.1	57.9248		1028.1	38.0997
	1029.07	81.061		1029.07	80.708		1029.07	61.2658		1029.07	38.6822
	1030.03	81.7887		1030.03	80.3542		1030.03	64.9052		1030.03	39.2772
	1031	82.592		1031	79.9728		1031	68.7421		1031	40.0537
	1031.96	83.3975		1031.96	79.609		1031.96	72.2658		1031.96	40.8522
	1032.93	84.1846		1032.93	79.176		1032.93	74.9752		1032.93	41.5234
	1033.89	84.8757		1033.89	78.6579		1033.89	76.68		1033.89	41.9842
	1034.85	85.5355		1034.85	78.2173		1034.85	77.739		1034.85	42.2718
	1035.82	86.2106		1035.82	77.7974		1035.82	78.443		1035.82	42.3991
	1036.78	86.7868		1036.78	77.3612		1036.78	78.7045		1036.78	42.4494
	1037.75	87.0554		1037.75	76.8012		1037.75	78.3488		1037.75	42.4245
	1038.71	87.2974		1038.71	76.1851		1038.71	77.7346		1038.71	42.4455
	1039.68	87.4652		1039.68	75.5671		1039.68	77.0093		1039.68	42.4062
	1040.64	87.378		1040.64	75.0519		1040.64	76.0733		1040.64	42.3886
	1041.61	87.1111		1041.61	74.4832		1041.61	74.961		1041.61	42.2864
	1042.57	86.6259		1042.57	73.8587		1042.57	73.9014		1042.57	42.1168
	1043.53	86.0137		1043.53	73.268		1043.53	73.2589		1043.53	42.0834
	1044.5	85.4084		1044.5	72.7109		1044.5	73.2879		1044.5	42.3315
	1045.46	84.7562		1045.46	72.1571		1045.46	73.958		1045.46	42.7087
	1046.43	84.1356		1046.43	71.6042		1046.43	75.2566		1046.43	43.171
	1047.39	83.7483		1047.39	71.172		1047.39	77.0841		1047.39	43.7251
	1048.36	83.5505		1048.36	70.7752		1048.36	79.1549		1048.36	44.3661
	1049.32	83.4407		1049.32	70.4112		1049.32	81.009		1049.32	44.9026
	1050.29	83.5705		1050.29	70.186		1050.29	82.3835		1050.29	45.3736
	1051.25	83.9585		1051.25	69.9332		1051.25	83.1746		1051.25	45.8802
	1052.21	84.4819		1052.21	69.6972		1052.21	83.5075		1052.21	46.3999
	1053.18	85.1483		1053.18	69.4745		1053.18	83.5623		1053.18	46.7249
	1054.14	85.8897		1054.14	69.277		1054.14	83.437		1054.14	47.157
	1055.11	86.4836		1055.11	69.1805		1055.11	83.0942		1055.11	47.5613
	1056.07	86.8913		1056.07	69.1175		1056.07	82.5933		1056.07	47.9415
	1057.04	87.2112		1057.04	69.0405		1057.04	81.9559		1057.04	48.2891
	1058	87.6187		1058	69.0453		1058	81.2003		1058	48.6488
	1058.97	88.125		1058.97	69.1265		1058.97	80.3471		1058.97	48.9429
	1059.93	88.662		1059.93	69.1936		1059.93	79.4111		1059.93	49.1736
	1060.89	89.1071		1060.89	69.232		1060.89	78.4831		1060.89	49.2383
	1061.86	89.3915		1061.86	69.3299		1061.86	77.6862		1061.86	49.3608
	1062.82	89.3956		1062.82	69.4571		1062.82	76.9655		1062.82	49.5183
	1063.79	89.2846		1063.79	69.6314		1063.79	76.1723		1063.79	49.5499
	1064.75	89.2742		1064.75	69.7383		1064.75	75.1375		1064.75	49.4589
	1065.72	89.2722		1065.72	69.9322		1065.72	73.8584		1065.72	49.3409
	1066.68	89.3329		1066.68	70.1582		1066.68	72.8558		1066.68	49.0998
	1067.65	89.3795		1067.65	70.3665		1067.65	72.9048		1067.65	49.0046
	1068.61	89.4122		1068.61	70.5628		1068.61	73.9772		1068.61	49.0621
	1069.57	89.4409		1069.57	70.8555		1069.57	75.2945		1069.57	49.1442
	1070.54	89.3514		1070.54	71.166		1070.54	75.9416		1070.54	49.0964
	1071.5	89.0447		1071.5	71.4164		1071.5	75.6771		1071.5	48.9447
	1072.47	88.6681		1072.47	71.596		1072.47	74.8402		1072.47	48.7178
	1073.43	88.4548		1073.43	71.8423		1073.43	73.8605		1073.43	48.4479
	1074.4	88.3157		1074.4	72.1233		1074.4	72.996		1074.4	48.2239
	1075.36	88.1549		1075.36	72.3277		1075.36	72.3983		1075.36	48.1898
	1076.33	88.054		1076.33	72.3568		1076.33	72.3004		1076.33	48.1609
	1077.29	87.9133		1077.29	72.3898		1077.29	72.803		1077.29	48.2942
	1078.25	87.8508		1078.25	72.4324		1078.25	73.7275		1078.25	48.6123
	1079.22	87.9805		1079.22	72.4774		1079.22	74.96		1079.22	49.075
	1080.18	88.1683		1080.18	72.3564		1080.18	76.023		1080.18	49.5291
	1081.15	88.4273		1081.15	72.2317		1081.15	76.7551		1081.15	49.9533
	1082.11	88.7239		1082.11	72.1808		1082.11	77.0661		1082.11	50.3948
	1083.08	88.999		1083.08	72.1872		1083.08	77.1137		1083.08	50.8303
	1084.04	89.1503		1084.04	72.1111		1084.04	76.9501		1084.04	51.2565
	1085.01	89.2623		1085.01	72.1262		1085.01	76.8589		1085.01	51.6693
	1085.97	89.3658		1085.97	72.3156		1085.97	77.0895		1085.97	52.0125
	1086.93	89.3506		1086.93	72.5185		1086.93	77.525		1086.93	52.4141
	1087.9	89.3452		1087.9	72.7155		1087.9	77.9394		1087.9	52.7384
	1088.86	89.2801		1088.86	73.0268		1088.86	78.1218		1088.86	52.9557
	1089.83	89.1323		1089.83	73.3654		1089.83	78.0212		1089.83	53.034
	1090.79	88.9807		1090.79	73.6856		1090.79	77.7849		1090.79	53.0286
	1091.76	88.7734		1091.76	74.0361		1091.76	77.3931		1091.76	52.984
	1092.72	88.4486		1092.72	74.4432		1092.72	76.8804		1092.72	52.8562
	1093.69	88.102		1093.69	74.8782		1093.69	76.3488		1093.69	52.5948
	1094.65	87.6422		1094.65	75.355		1094.65	75.7618		1094.65	52.3156
	1095.61	87.2599		1095.61	75.8218		1095.61	75.0733		1095.61	51.9717
	1096.58	86.8544		1096.58	76.2249		1096.58	74.3899		1096.58	51.6658
	1097.54	86.3142		1097.54	76.6012		1097.54	73.6586		1097.54	51.3868
	1098.51	85.6998		1098.51	77.0134		1098.51	72.9206		1098.51	51.0681
	1099.47	85.1564		1099.47	77.3975		1099.47	72.141		1099.47	50.708
	1100.44	84.6036		1100.44	77.8271		1100.44	71.2291		1100.44	50.4766
	1101.4	84.0015		1101.4	78.2409		1101.4	70.2248		1101.4	50.18
	1102.37	83.5917		1102.37	78.7002		1102.37	69.2587		1102.37	49.9495
	1103.33	83.3944		1103.33	79.2161		1103.33	68.2016		1103.33	49.752
	1104.29	83.4233		1104.29	79.6999		1104.29	67.0664		1104.29	49.5466
	1105.26	83.4762		1105.26	80.0063		1105.26	65.6945		1105.26	49.3842
	1106.22	83.6477		1106.22	80.3466		1106.22	64.2291		1106.22	49.3077
	1107.19	83.9292		1107.19	80.7696		1107.19	62.6936		1107.19	49.126
	1108.15	83.9838		1108.15	81.2035		1108.15	61.0648		1108.15	48.999
	1109.12	83.7733		1109.12	81.5813		1109.12	59.3278		1109.12	48.7985
	1110.08	83.513		1110.08	81.8728		1110.08	57.7798		1110.08	48.6121
	1111.05	83.5436		1111.05	82.1616		1111.05	56.7869		1111.05	48.4699
	1112.01	84.039		1112.01	82.4591		1112.01	56.8207		1112.01	48.6288
	1112.97	84.8239		1112.97	82.681		1112.97	57.8402		1112.97	49.0111
	1113.94	85.7265		1113.94	82.8733		1113.94	59.489		1113.94	49.6935
	1114.9	86.5288		1114.9	82.9782		1114.9	61.1067		1114.9	50.4982
	1115.87	87.0637		1115.87	83.1058		1115.87	61.9885		1115.87	51.2321
	1116.83	87.3537		1116.83	83.281		1116.83	61.8738		1116.83	51.6492
	1117.8	87.6483		1117.8	83.4874		1117.8	61.2393		1117.8	51.9041
	1118.76	87.9713		1118.76	83.5521		1118.76	60.5204		1118.76	52.0284
	1119.73	88.3811		1119.73	83.6295		1119.73	60.1694		1119.73	52.1437
	1120.69	88.9947		1120.69	83.8107		1120.69	60.3874		1120.69	52.3294
	1121.65	89.7386		1121.65	84.0493		1121.65	61.1898		1121.65	52.638
	1122.62	90.4683		1122.62	84.2318		1122.62	62.3517		1122.62	53.0915
	1123.58	90.9996		1123.58	84.258		1123.58	63.7125		1123.58	53.8118
	1124.55	91.3755		1124.55	84.3292		1124.55	65.1407		1124.55	54.576
	1125.51	91.5845		1125.51	84.4758		1125.51	66.4921		1125.51	55.2324
	1126.48	91.6999		1126.48	84.6046		1126.48	67.6566		1126.48	55.6993
	1127.44	91.7533		1127.44	84.7099		1127.44	68.6109		1127.44	55.9815
	1128.41	91.6585		1128.41	84.6868		1128.41	69.1202		1128.41	55.9804
	1129.37	91.6293		1129.37	84.5999		1129.37	69.1817		1129.37	55.6701
	1130.33	91.6452		1130.33	84.4203		1130.33	68.9207		1130.33	55.226
	1131.3	91.5462		1131.3	84.2524		1131.3	68.5094		1131.3	54.7508
	1132.26	91.4703		1132.26	84.2061		1132.26	68.043		1132.26	54.1113
	1133.23	91.3741		1133.23	84.137		1133.23	67.6208		1133.23	53.4705
	1134.19	91.158		1134.19	83.9441		1134.19	67.2648		1134.19	52.8779
	1135.16	90.8617		1135.16	83.7724		1135.16	67.0604		1135.16	52.2754
	1136.12	90.5417		1136.12	83.6118		1136.12	66.9742		1136.12	51.7249
	1137.09	90.0699		1137.09	83.525		1137.09	66.9822		1137.09	51.3524
	1138.05	89.5032		1138.05	83.4858		1138.05	67.1508		1138.05	51.0627
	1139.01	88.9109		1139.01	83.5217		1139.01	67.4588		1139.01	50.9817
	1139.98	88.3066		1139.98	83.5848		1139.98	67.8875		1139.98	51.0489
	1140.94	87.7807		1140.94	83.6105		1140.94	68.5123		1140.94	51.2771
	1141.91	87.1794		1141.91	83.5274		1141.91	69.1848		1141.91	51.5809
	1142.87	86.5316		1142.87	83.4989		1142.87	69.8975		1142.87	52.1191
	1143.84	85.9831		1143.84	83.4972		1143.84	70.706		1143.84	52.8063
	1144.8	85.6173		1144.8	83.5349		1144.8	71.6195		1144.8	53.6012
	1145.77	85.4089		1145.77	83.5555		1145.77	72.604		1145.77	54.4693
	1146.73	85.4069		1146.73	83.571		1146.73	73.6526		1146.73	55.4173
	1147.69	85.52		1147.69	83.5295		1147.69	74.754		1147.69	56.4576
	1148.66	85.8346		1148.66	83.542		1148.66	75.9467		1148.66	57.5278
	1149.62	86.3442		1149.62	83.6294		1149.62	77.0785		1149.62	58.563
	1150.59	86.892		1150.59	83.6466		1150.59	78.2182		1150.59	59.6712
	1151.55	87.5519		1151.55	83.5664		1151.55	79.412		1151.55	60.7213
	1152.52	88.2667		1152.52	83.5363		1152.52	80.5766		1152.52	61.8356
	1153.48	88.9696		1153.48	83.4428		1153.48	81.664		1153.48	62.9582
	1154.45	89.7467		1154.45	83.3298		1154.45	82.7882		1154.45	63.9973
	1155.41	90.3628		1155.41	83.2732		1155.41	83.8024		1155.41	64.9932
	1156.37	91.0095		1156.37	83.2129		1156.37	84.691		1156.37	65.981
	1157.34	91.654		1157.34	83.0749		1157.34	85.4766		1157.34	66.9554
	1158.3	92.219		1158.3	82.9237		1158.3	86.1131		1158.3	67.9034
	1159.27	92.7218		1159.27	82.8372		1159.27	86.6513		1159.27	68.7814
	1160.23	93.0974		1160.23	82.7588		1160.23	87.0746		1160.23	69.6041
	1161.2	93.3541		1161.2	82.5863		1161.2	87.3997		1161.2	70.2796
	1162.16	93.6118		1162.16	82.4695		1162.16	87.666		1162.16	70.9668
	1163.13	93.8822		1163.13	82.4001		1163.13	87.8923		1163.13	71.6687
	1164.09	94.1013		1164.09	82.3664		1164.09	88.0524		1164.09	72.2822
	1165.05	94.3421		1165.05	82.3247		1165.05	88.1959		1165.05	72.8589
	1166.02	94.5361		1166.02	82.2398		1166.02	88.3057		1166.02	73.3766
	1166.98	94.6365		1166.98	82.176		1166.98	88.3043		1166.98	73.7897
	1167.95	94.8017		1167.95	82.1477		1167.95	88.3239		1167.95	74.1147
	1168.91	94.9751		1168.91	82.1851		1168.91	88.4116		1168.91	74.3669
	1169.88	95.1014		1169.88	82.1778		1169.88	88.4333		1169.88	74.6239
	1170.84	95.2177		1170.84	82.1758		1170.84	88.3855		1170.84	74.7716
	1171.81	95.2979		1171.81	82.1735		1171.81	88.3413		1171.81	74.8996
	1172.77	95.3286		1172.77	82.1962		1172.77	88.3015		1172.77	74.9461
	1173.73	95.3318		1173.73	82.247		1173.73	88.1748		1173.73	74.9399
	1174.7	95.3675		1174.7	82.2763		1174.7	88.0428		1174.7	74.8815
	1175.66	95.4345		1175.66	82.3199		1175.66	87.9636		1175.66	74.7916
	1176.63	95.442		1176.63	82.32		1176.63	87.8192		1176.63	74.6518
	1177.59	95.502		1177.59	82.3394		1177.59	87.6488		1177.59	74.569
	1178.56	95.5148		1178.56	82.3633		1178.56	87.4463		1178.56	74.4247
	1179.52	95.4724		1179.52	82.3621		1179.52	87.2157		1179.52	74.2062
	1180.49	95.4384		1180.49	82.3886		1180.49	86.9195		1180.49	73.9759
	1181.45	95.4985		1181.45	82.4257		1181.45	86.5897		1181.45	73.7509
	1182.41	95.52		1182.41	82.4512		1182.41	86.2789		1182.41	73.5191
	1183.38	95.4521		1183.38	82.5262		1183.38	85.8945		1183.38	73.2634
	1184.34	95.44		1184.34	82.5812		1184.34	85.4495		1184.34	72.955
	1185.31	95.4376		1185.31	82.6635		1185.31	84.9793		1185.31	72.6015
	1186.27	95.3911		1186.27	82.7528		1186.27	84.4836		1186.27	72.2713
	1187.24	95.3514		1187.24	82.833		1187.24	84.0265		1187.24	71.9817
	1188.2	95.2942		1188.2	82.8662		1188.2	83.553		1188.2	71.694
	1189.17	95.2163		1189.17	82.9176		1189.17	82.951		1189.17	71.4083
	1190.13	95.1881		1190.13	82.9155		1190.13	82.2823		1190.13	71.0193
	1191.09	95.1128		1191.09	82.9295		1191.09	81.6555		1191.09	70.6563
	1192.06	95.0532		1192.06	82.9702		1192.06	81.0499		1192.06	70.361
	1193.02	94.9471		1193.02	82.9757		1193.02	80.3388		1193.02	70.0744
	1193.99	94.8303		1193.99	82.9456		1193.99	79.5846		1193.99	69.7211
	1194.95	94.733		1194.95	82.969		1194.95	78.9215		1194.95	69.4289
	1195.92	94.5894		1195.92	82.9356		1195.92	78.352		1195.92	69.0977
	1196.88	94.4112		1196.88	82.9307		1196.88	77.9247		1196.88	68.7648
	1197.85	94.1781		1197.85	82.9563		1197.85	77.6939		1197.85	68.5156
	1198.81	93.9573		1198.81	82.8906		1198.81	77.8256		1198.81	68.3599
	1199.78	93.7472		1199.78	82.7831		1199.78	78.2449		1199.78	68.3224
	1200.74	93.4497		1200.74	82.8042		1200.74	78.9023		1200.74	68.3874
	1201.7	93.1743		1201.7	82.8584		1201.7	79.6729		1201.7	68.4583
	1202.67	92.9402		1202.67	82.795		1202.67	80.3746		1202.67	68.6006
	1203.63	92.8639		1203.63	82.7084		1203.63	81.0374		1203.63	68.7884
	1204.6	92.995		1204.6	82.6189		1204.6	81.6457		1204.6	68.9842
	1205.56	93.3048		1205.56	82.454		1205.56	82.2837		1205.56	69.1184
	1206.53	93.602		1206.53	82.3425		1206.53	82.882		1206.53	69.3109
	1207.49	93.7632		1207.49	82.2142		1207.49	83.2855		1207.49	69.5426
	1208.46	93.9243		1208.46	82.1203		1208.46	83.6102		1208.46	69.7333
	1209.42	94.0344		1209.42	81.9956		1209.42	83.8651		1209.42	69.81
	1210.38	94.0273		1210.38	81.8334		1210.38	83.9118		1210.38	69.9048
	1211.35	93.9646		1211.35	81.6574		1211.35	83.6938		1211.35	69.9252
	1212.31	93.8861		1212.31	81.4785		1212.31	83.2753		1212.31	69.9048
	1213.28	93.856		1213.28	81.3596		1213.28	82.7966		1213.28	69.9286
	1214.24	93.715		1214.24	81.2674		1214.24	82.198		1214.24	69.9173
	1215.21	93.5164		1215.21	81.2057		1215.21	81.4594		1215.21	69.8205
	1216.17	93.3781		1216.17	81.1235		1216.17	80.6939		1216.17	69.7127
	1217.14	93.1776		1217.14	81.0296		1217.14	79.9036		1217.14	69.5802
	1218.1	92.8624		1218.1	80.9533		1218.1	79.0727		1218.1	69.4275
	1219.06	92.4615		1219.06	80.8799		1219.06	78.2311		1219.06	69.2499
	1220.03	92.0705		1220.03	80.7777		1220.03	77.5973		1220.03	69.0357
	1220.99	91.6333		1220.99	80.6916		1220.99	77.1933		1220.99	68.8593
	1221.96	91.2787		1221.96	80.6768		1221.96	77.2195		1221.96	68.8572
	1222.92	91.0384		1222.92	80.5948		1222.92	77.7286		1222.92	68.9252
	1223.89	90.9516		1223.89	80.4833		1223.89	78.654		1223.89	69.1272
	1224.85	91.0157		1224.85	80.3665		1224.85	79.7893		1224.85	69.4442
	1225.82	91.3279		1225.82	80.3336		1225.82	80.909		1225.82	69.8294
	1226.78	91.8097		1226.78	80.2394		1226.78	81.82		1226.78	70.2223
	1227.74	92.2352		1227.74	80.1032		1227.74	82.5489		1227.74	70.6034
	1228.71	92.5893		1228.71	80.0401		1228.71	83.2109		1228.71	70.8873
	1229.67	92.92		1229.67	79.9887		1229.67	83.922		1229.67	71.0997
	1230.64	93.2091		1230.64	79.9637		1230.64	84.6561		1230.64	71.3024
	1231.6	93.4698		1231.6	80.0217		1231.6	85.361		1231.6	71.5464
	1232.57	93.6494		1232.57	80.0314		1232.57	85.8627		1232.57	71.7414
	1233.53	93.7938		1233.53	80.0505		1233.53	86.159		1233.53	71.8419
	1234.5	93.8531		1234.5	80.0562		1234.5	86.1661		1234.5	71.8812
	1235.46	93.9349		1235.46	80.1188		1235.46	85.9738		1235.46	71.9511
	1236.42	93.9987		1236.42	80.1967		1236.42	85.5115		1236.42	71.9001
	1237.39	94.0451		1237.39	80.2943		1237.39	84.8668		1237.39	71.7651
	1238.35	94.091		1238.35	80.3574		1238.35	84.1083		1238.35	71.6049
	1239.32	94.1948		1239.32	80.4256		1239.32	83.2483		1239.32	71.4322
	1240.28	94.2403		1240.28	80.5756		1240.28	82.2473		1240.28	71.2478
	1241.25	94.2409		1241.25	80.7439		1241.25	81.1977		1241.25	71.0792
	1242.21	94.1732		1242.21	80.869		1242.21	80.0324		1242.21	70.8568
	1243.18	94.1723		1243.18	80.9989		1243.18	78.9199		1243.18	70.5656
	1244.14	94.1371		1244.14	81.1447		1244.14	77.9599		1244.14	70.2507
	1245.1	94.1448		1245.1	81.3866		1245.1	77.172		1245.1	70.0234
	1246.07	94.2278		1246.07	81.695		1246.07	76.6206		1246.07	69.8254
	1247.03	94.2537		1247.03	81.9985		1247.03	76.4626		1247.03	69.7381
	1248	94.2023		1248	82.239		1248	76.683		1248	69.7454
	1248.96	94.1462		1248.96	82.544		1248.96	77.1179		1248.96	69.8161
	1249.93	94.1823		1249.93	82.8067		1249.93	77.6471		1249.93	69.7824
	1250.89	94.1988		1250.89	83.0718		1250.89	78.2028		1250.89	69.8254
	1251.86	94.1246		1251.86	83.361		1251.86	78.6501		1251.86	69.9073
	1252.82	94.1023		1252.82	83.7589		1252.82	78.9555		1252.82	69.8359
	1253.78	94.1168		1253.78	84.1484		1253.78	79.0965		1253.78	69.689
	1254.75	94.1274		1254.75	84.4861		1254.75	79.1731		1254.75	69.5685
	1255.71	94.112		1255.71	84.8053		1255.71	79.147		1255.71	69.4189
	1256.68	94.0577		1256.68	85.122		1256.68	78.9517		1256.68	69.34
	1257.64	93.964		1257.64	85.4315		1257.64	78.6022		1257.64	69.1898
	1258.61	93.9233		1258.61	85.7551		1258.61	78.2711		1258.61	69.0076
	1259.57	93.8438		1259.57	85.963		1259.57	77.8614		1259.57	68.7618
	1260.54	93.6662		1260.54	86.1752		1260.54	77.2682		1260.54	68.5345
	1261.5	93.7022		1261.5	86.5139		1261.5	76.7275		1261.5	68.3816
	1262.46	93.6806		1262.46	86.7657		1262.46	76.1766		1262.46	68.1826
	1263.43	93.5674		1263.43	86.8585		1263.43	75.5846		1263.43	67.9149
	1264.39	93.5299		1264.39	86.9813		1264.39	75.015		1264.39	67.659
	1265.36	93.5066		1265.36	87.1747		1265.36	74.4168		1265.36	67.3038
	1266.32	93.393		1266.32	87.3883		1266.32	73.7848		1266.32	66.9712
	1267.29	93.3908		1267.29	87.5625		1267.29	73.2624		1267.29	66.7069
	1268.25	93.3777		1268.25	87.7482		1268.25	72.7912		1268.25	66.421
	1269.22	93.2139		1269.22	87.9666		1269.22	72.3155		1269.22	66.1028
	1270.18	93.1388		1270.18	88.1269		1270.18	72.0831		1270.18	65.7723
	1271.14	93.1349		1271.14	88.2162		1271.14	72.005		1271.14	65.4681
	1272.11	93.0856		1272.11	88.2882		1272.11	71.8689		1272.11	65.2682
	1273.07	93.2676		1273.07	88.4226		1273.07	71.8464		1273.07	65.1002
	1274.04	93.3827		1274.04	88.6084		1274.04	71.9694		1274.04	64.9775
	1275	93.3487		1275	88.7845		1275	72.1425		1275	64.8579
	1275.97	93.3301		1275.97	88.9304		1275.97	72.4842		1275.97	64.7803
	1276.93	93.3481		1276.93	89.0695		1276.93	73.022		1276.93	64.767
	1277.9	93.353		1277.9	89.255		1277.9	73.7858		1277.9	64.9131
	1278.86	93.3237		1278.86	89.3747		1278.86	74.7322		1278.86	65.1652
	1279.82	93.2745		1279.82	89.4492		1279.82	75.897		1279.82	65.4922
	1280.79	93.3208		1280.79	89.5054		1280.79	77.2083		1280.79	65.9489
	1281.75	93.4032		1281.75	89.5727		1281.75	78.5694		1281.75	66.4563
	1282.72	93.4156		1282.72	89.6729		1282.72	79.7819		1282.72	66.8591
	1283.68	93.4625		1283.68	89.8243		1283.68	80.7657		1283.68	67.2296
	1284.65	93.5704		1284.65	89.9626		1284.65	81.4138		1284.65	67.471
	1285.61	93.6997		1285.61	90.1059		1285.61	81.6821		1285.61	67.5822
	1286.58	93.7095		1286.58	90.2481		1286.58	81.5058		1286.58	67.5115
	1287.54	93.5444		1287.54	90.3861		1287.54	80.9717		1287.54	67.3265
	1288.5	93.4757		1288.5	90.5585		1288.5	80.2086		1288.5	67.1889
	1289.47	93.5806		1289.47	90.7551		1289.47	79.4393		1289.47	67.0581
	1290.43	93.5962		1290.43	90.8644		1290.43	78.594		1290.43	66.7589
	1291.4	93.5922		1291.4	90.9736		1291.4	77.7738		1291.4	66.4978
	1292.36	93.581		1292.36	91.05		1292.36	76.8727		1292.36	66.2516
	1293.33	93.5231		1293.33	91.1021		1293.33	76.0622		1293.33	65.9118
	1294.29	93.478		1294.29	91.1299		1294.29	75.3787		1294.29	65.5474
	1295.26	93.4331		1295.26	91.1848		1295.26	74.8541		1295.26	65.2727
	1296.22	93.3065		1296.22	91.2393		1296.22	74.3305		1296.22	64.9432
	1297.18	93.2374		1297.18	91.313		1297.18	73.8826		1297.18	64.6639
	1298.15	93.4288		1298.15	91.3685		1298.15	73.6758		1298.15	64.4309
	1299.11	93.6171		1299.11	91.4095		1299.11	73.6102		1299.11	64.2427
	1300.08	93.7469		1300.08	91.4602		1300.08	73.5312		1300.08	64.1071
	1301.04	93.8735		1301.04	91.551		1301.04	73.4717		1301.04	64.0139
	1302.01	93.9909		1302.01	91.6562		1302.01	73.4362		1302.01	63.8985
	1302.97	94.0577		1302.97	91.7462		1302.97	73.4175		1302.97	63.7152
	1303.94	94.101		1303.94	91.7896		1303.94	73.3596		1303.94	63.6849
	1304.9	94.1167		1304.9	91.7654		1304.9	72.9357		1304.9	63.5
	1305.86	94.1653		1305.86	91.7833		1305.86	72.3864		1305.86	63.2889
	1306.83	94.1842		1306.83	91.7904		1306.83	71.6797		1306.83	63.0808
	1307.79	93.9512		1307.79	91.7977		1307.79	70.8056		1307.79	62.7168
	1308.76	93.9715		1308.76	91.8284		1308.76	69.8701		1308.76	62.3662
	1309.72	94.3164		1309.72	92.0908		1309.72	68.9988		1309.72	62.0183
	1310.69	94.2795		1310.69	92.101		1310.69	68.2553		1310.69	61.5393
	1311.65	93.9476		1311.65	91.8969		1311.65	67.8752		1311.65	61.1075
	1312.62	93.8967		1312.62	91.912		1312.62	67.525		1312.62	60.8094
	1313.58	93.8666		1313.58	91.9323		1313.58	67.5541		1313.58	60.4052
	1314.54	93.8276		1314.54	91.9524		1314.54	67.6843		1314.54	60.1769
	1315.51	93.7863		1315.51	92.0178		1315.51	67.7769		1315.51	59.9332
	1316.47	93.7036		1316.47	91.9762		1316.47	67.8037		1316.47	59.7469
	1317.44	93.6244		1317.44	91.9819		1317.44	67.8346		1317.44	59.6049
	1318.4	93.5506		1318.4	91.9917		1318.4	68.0071		1318.4	59.7897
	1319.37	93.4747		1319.37	92.0033		1319.37	68.3224		1319.37	59.9702
	1320.33	93.4074		1320.33	92.0113		1320.33	68.837		1320.33	59.4419
	1321.3	93.3722		1321.3	92.0125		1321.3	69.3779		1321.3	59.4066
	1322.26	93.604		1322.26	91.9769		1322.26	69.8425		1322.26	59.4922
	1323.22	93.2934		1323.22	91.8842		1323.22	70.5549		1323.22	59.6366
	1324.19	93.3092		1324.19	91.9407		1324.19	71.3608		1324.19	59.8653
	1325.15	93.1706		1325.15	92.0243		1325.15	72.1722		1325.15	60.0956
	1326.12	92.9601		1326.12	92.0211		1326.12	72.9552		1326.12	60.3676
	1327.08	92.6681		1327.08	92.0764		1327.08	73.6983		1327.08	60.5807
	1328.05	92.4091		1328.05	92.0798		1328.05	74.4127		1328.05	60.8127
	1329.01	92.1413		1329.01	91.9933		1329.01	75.1624		1329.01	61.0518
	1329.98	92.0068		1329.98	91.9747		1329.98	75.8542		1329.98	61.3475
	1330.94	92.07		1330.94	92.064		1330.94	76.4999		1330.94	61.6854
	1331.9	92.1769		1331.9	92.1313		1331.9	77.1903		1331.9	61.9624
	1332.87	92.1938		1332.87	92.1216		1332.87	77.9096		1332.87	62.1666
	1333.83	92.1714		1333.83	92.0612		1333.83	78.5607		1333.83	62.5262
	1334.8	92.0314		1334.8	92.0178		1334.8	79.243		1334.8	62.8979
	1335.76	91.9881		1335.76	91.9329		1335.76	79.5265		1335.76	63.1091
	1336.73	91.9776		1336.73	91.9335		1336.73	79.5448		1336.73	63.3944
	1337.69	91.9462		1337.69	91.935		1337.69	80.0334		1337.69	63.6869
	1338.66	91.9167		1338.66	91.9343		1338.66	80.4487		1338.66	63.9879
	1339.62	91.8937		1339.62	91.9396		1339.62	80.9022		1339.62	64.2908
	1340.58	91.9041		1340.58	91.9417		1340.58	81.3812		1340.58	64.6015
	1341.55	91.8849		1341.55	91.938		1341.55	82.035		1341.55	64.91
	1342.51	91.7227		1342.51	91.7958		1342.51	82.6194		1342.51	65.2045
	1343.48	91.9201		1343.48	91.9411		1343.48	82.7882		1343.48	65.4573
	1344.44	92.0396		1344.44	91.9514		1344.44	83.0555		1344.44	65.7727
	1345.41	92.0806		1345.41	91.9589		1345.41	83.4158		1345.41	66.0744
	1346.37	92.1193		1346.37	91.9777		1346.37	83.7858		1346.37	66.3841
	1347.34	92.1606		1347.34	91.9893		1347.34	84.069		1347.34	66.6776
	1348.3	92.1821		1348.3	91.9851		1348.3	84.2822		1348.3	66.9416
	1349.26	92.2018		1349.26	91.9739		1349.26	84.5149		1349.26	67.2136
	1350.23	92.2207		1350.23	91.9677		1350.23	84.7442		1350.23	67.4762
	1351.19	92.2547		1351.19	91.9589		1351.19	85.0118		1351.19	67.7417
	1352.16	92.3082		1352.16	91.9547		1352.16	85.1909		1352.16	67.9987
	1353.12	92.3625		1353.12	91.9456		1353.12	85.3372		1353.12	68.253
	1354.09	92.4075		1354.09	91.933		1354.09	85.4904		1354.09	68.4882
	1355.05	92.4314		1355.05	91.9189		1355.05	85.5698		1355.05	68.7205
	1356.02	92.4454		1356.02	91.8997		1356.02	85.9682		1356.02	68.9435
	1356.98	92.8525		1356.98	92.1252		1356.98	86.6223		1356.98	69.5365
	1357.94	92.5752		1357.94	91.9302		1357.94	86.3411		1357.94	69.4129
	1358.91	92.9789		1358.91	92.5958		1358.91	85.7686		1358.91	69.9072
	1359.87	92.4525		1359.87	91.7593		1359.87	85.6155		1359.87	69.734
	1360.84	92.3879		1360.84	91.6687		1360.84	85.6193		1360.84	69.8764
	1361.8	92.3527		1361.8	91.5924		1361.8	85.5817		1361.8	70.0368
	1362.77	92.3279		1362.77	91.5161		1362.77	85.5293		1362.77	70.1878
	1363.73	92.3185		1363.73	91.4339		1363.73	85.2894		1363.73	70.3398
	1364.7	92.3219		1364.7	91.3565		1364.7	84.7837		1364.7	70.475
	1365.66	92.3009		1365.66	91.2678		1365.66	85.011		1365.66	70.5978
	1366.62	92.2667		1366.62	91.212		1366.62	85.6964		1366.62	70.7266
	1367.59	92.2474		1367.59	91.1098		1367.59	86.3723		1367.59	70.8483
	1368.55	92.2258		1368.55	90.9828		1368.55	86.6168		1368.55	70.963
	1369.52	92.1922		1369.52	90.8868		1369.52	86.952		1369.52	71.0847
	1370.48	91.7132		1370.48	90.8406		1370.48	87.1132		1370.48	71.1984
	1371.45	91.6764		1371.45	90.773		1371.45	87.2739		1371.45	71.2431
	1372.41	92.1453		1372.41	90.6381		1372.41	87.4321		1372.41	71.444
	1373.38	92.1961		1373.38	90.6356		1373.38	86.9762		1373.38	71.5555
	1374.34	92.2084		1374.34	90.5911		1374.34	86.8867		1374.34	71.6577
	1375.3	92.244		1375.3	90.5245		1375.3	87.1626		1375.3	71.7665
	1376.27	92.2811		1376.27	89.9609		1376.27	87.8521		1376.27	71.8803
	1377.23	92.1779		1377.23	89.4625		1377.23	87.8422		1377.23	71.9076
	1378.2	92.3878		1378.2	90.0746		1378.2	87.7067		1378.2	72.1047
	1379.16	92.4303		1379.16	90.091		1379.16	87.5513		1379.16	72.227
	1380.13	92.4323		1380.13	89.8833		1380.13	87.4031		1380.13	72.3537
	1381.09	92.3856		1381.09	90.0237		1381.09	87.2931		1381.09	72.6321
	1382.06	92.4616		1382.06	90.2408		1382.06	86.9614		1382.06	72.721
	1383.02	92.5516		1383.02	90.4963		1383.02	86.6229		1383.02	72.7818
	1383.98	92.6554		1383.98	90.7618		1383.98	86.2767		1383.98	72.9424
	1384.95	92.8219		1384.95	90.8803		1384.95	86.0271		1384.95	73.0001
	1385.91	92.9832		1385.91	90.6419		1385.91	86.1945		1385.91	73.1126
	1386.88	93.0502		1386.88	90.6335		1386.88	86.8355		1386.88	73.26
	1387.84	93.1246		1387.84	90.6939		1387.84	86.8895		1387.84	73.4116
	1388.81	93.229		1388.81	90.834		1388.81	85.9933		1388.81	73.5588
	1389.77	93.8401		1389.77	91.2542		1389.77	85.7445		1389.77	73.5291
	1390.74	93.8484		1390.74	91.2339		1390.74	86.087		1390.74	73.7858
	1391.7	93.9957		1391.7	91.2327		1391.7	86.5306		1391.7	73.8263
	1392.66	94.1026		1392.66	91.1394		1392.66	87.1239		1392.66	73.9622
	1393.63	93.4242		1393.63	91.1618		1393.63	87.7579		1393.63	74.2923
	1394.59	93.4322		1394.59	91.2391		1394.59	87.981		1394.59	74.432
	1395.56	93.4596		1395.56	91.3106		1395.56	88.1594		1395.56	74.5723
	1396.52	93.4928		1396.52	91.3733		1396.52	88.4006		1396.52	74.7134
	1397.49	93.5097		1397.49	91.4264		1397.49	88.5715		1397.49	74.8531
	1398.45	93.5207		1398.45	91.4746		1398.45	88.6818		1398.45	74.992
	1399.42	93.5313		1399.42	91.5254		1399.42	88.8634		1399.42	75.1406
	1400.38	93.545		1400.38	91.5871		1400.38	89.2302		1400.38	75.3128
	1401.34	93.4706		1401.34	91.7054		1401.34	89.9761		1401.34	75.7541
	1402.31	93.4342		1402.31	91.8321		1402.31	90.2072		1402.31	75.9086
	1403.27	93.5067		1403.27	91.7518		1403.27	90.1529		1403.27	75.8249
	1404.24	93.4991		1404.24	91.7425		1404.24	89.7106		1404.24	75.9202
	1405.2	93.4644		1405.2	91.7599		1405.2	89.8009		1405.2	76.0454
	1406.17	93.4297		1406.17	91.7911		1406.17	89.9373		1406.17	76.172
	1407.13	93.3875		1407.13	91.8292		1407.13	90.0629		1407.13	76.3084
	1408.1	93.3589		1408.1	91.8653		1408.1	90.1344		1408.1	76.4315
	1409.06	93.3373		1409.06	91.9001		1409.06	90.1493		1409.06	76.5334
	1410.02	93.3148		1410.02	91.9293		1410.02	90.1581		1410.02	76.6257
	1410.99	93.2896		1410.99	91.9469		1410.99	90.1734		1410.99	76.7026
	1411.95	93.2591		1411.95	91.965		1411.95	90.1671		1411.95	76.785
	1412.92	93.2352		1412.92	91.9918		1412.92	90.1551		1412.92	76.8672
	1413.88	93.2129		1413.88	92.0138		1413.88	90.1217		1413.88	76.9329
	1414.85	93.1884		1414.85	92.0217		1414.85	90.0578		1414.85	76.9827
	1415.81	93.1635		1415.81	92.018		1415.81	89.9818		1415.81	77.0182
	1416.78	93.1429		1416.78	92.0088		1416.78	89.9059		1416.78	77.0536
	1417.74	93.1224		1417.74	91.9962		1417.74	89.8292		1417.74	77.0918
	1418.71	93.1051		1418.71	91.9846		1418.71	89.7522		1418.71	77.1293
	1419.67	93.081		1419.67	91.9629		1419.67	89.6661		1419.67	77.163
	1420.63	93.0518		1420.63	91.9361		1420.63	89.5741		1420.63	77.1834
	1421.6	93.0244		1421.6	91.9053		1421.6	89.4752		1421.6	77.1942
	1422.56	93.0004		1422.56	91.8686		1422.56	89.3724		1422.56	77.1972
	1423.53	92.9769		1423.53	91.8232		1423.53	89.2681		1423.53	77.1865
	1424.49	92.9413		1424.49	91.7812		1424.49	89.1609		1424.49	77.1965
	1425.46	92.9084		1425.46	91.7433		1425.46	89.0421		1425.46	77.2022
	1426.42	92.8668		1426.42	91.6975		1426.42	88.9119		1426.42	77.1828
	1427.39	92.8201		1427.39	91.6318		1427.39	88.7923		1427.39	77.1436
	1428.35	92.7762		1428.35	91.5712		1428.35	88.6859		1428.35	77.1137
	1429.31	92.742		1429.31	91.5225		1429.31	88.5871		1429.31	77.0966
	1430.28	92.7128		1430.28	91.4812		1430.28	88.4781		1430.28	77.0876
	1431.24	92.6879		1431.24	91.4405		1431.24	88.3612		1431.24	77.09
	1432.21	92.6618		1432.21	91.3939		1432.21	88.2484		1432.21	77.086
	1433.17	92.6492		1433.17	91.3473		1433.17	88.1496		1433.17	77.0765
	1434.14	92.6393		1434.14	91.2892		1434.14	88.0609		1434.14	77.0803
	1435.1	92.629		1435.1	91.2246		1435.1	87.9921		1435.1	77.1055
	1436.07	92.6136		1436.07	91.1583		1436.07	87.9254		1436.07	77.1518
	1437.03	92.6085		1437.03	91.0995		1437.03	87.8643		1437.03	77.2091
	1437.99	92.6179		1437.99	91.0347		1437.99	87.8119		1437.99	77.2532
	1438.96	92.6171		1438.96	90.946		1438.96	87.7537		1438.96	77.2273
	1439.92	92.5823		1439.92	90.8734		1439.92	87.6744		1439.92	77.0458
	1440.89	92.5356		1440.89	90.8092		1440.89	87.5967		1440.89	76.9663
	1441.85	92.5393		1441.85	90.7536		1441.85	87.5683		1441.85	77.0037
	1442.82	92.3625		1442.82	90.7299		1442.82	87.446		1442.82	77.0931
	1443.78	92.3813		1443.78	90.6507		1443.78	87.4531		1443.78	77.2772
	1444.75	92.633		1444.75	90.5636		1444.75	87.5729		1444.75	77.4987
	1445.71	92.6489		1445.71	90.3333		1445.71	87.577		1445.71	77.6976
	1446.67	92.6683		1446.67	90.0415		1446.67	87.5742		1446.67	77.8165
	1447.64	92.6716		1447.64	89.8773		1447.64	87.5695		1447.64	77.9214
	1448.6	92.6858		1448.6	89.7823		1448.6	87.567		1448.6	78.0449
	1449.57	92.74		1449.57	89.8536		1449.57	87.5671		1449.57	78.2031
	1450.53	92.8663		1450.53	89.979		1450.53	87.5774		1450.53	78.3812
	1451.5	92.8606		1451.5	89.4951		1451.5	87.6026		1451.5	78.4266
	1452.46	92.9161		1452.46	89.305		1452.46	87.6305		1452.46	78.5566
	1453.43	93.0043		1453.43	89.1786		1453.43	87.6543		1453.43	78.7033
	1454.39	93.075		1454.39	88.9891		1454.39	87.6797		1454.39	78.8327
	1455.35	93.157		1455.35	88.8719		1455.35	87.7072		1455.35	78.9867
	1456.32	93.2571		1456.32	88.8029		1456.32	87.7412		1456.32	79.1685
	1457.28	93.3507		1457.28	88.7451		1457.28	87.7771		1457.28	79.3583
	1458.25	93.4398		1458.25	88.6771		1458.25	87.8209		1458.25	79.5407
	1459.21	93.5461		1459.21	88.6669		1459.21	87.8789		1459.21	79.7377
	1460.18	93.6083		1460.18	88.6135		1460.18	87.9286		1460.18	79.9334
	1461.14	93.6314		1461.14	88.3967		1461.14	87.9597		1461.14	80.1177
	1462.11	93.7542		1462.11	88.1934		1462.11	88.0068		1462.11	80.3154
	1463.07	93.931		1463.07	88.3059		1463.07	88.0746		1463.07	80.5488
	1464.03	94.0683		1464.03	88.6877		1464.03	88.1497		1464.03	80.8283
	1465	94.1741		1465	88.8433		1465	88.2263		1465	81.0946
	1465.96	94.287		1465.96	88.8102		1465.96	88.309		1465.96	81.3357
	1466.93	94.4159		1466.93	88.1384		1466.93	88.389		1466.93	81.4531
	1467.89	94.5856		1467.89	88.1642		1467.89	88.4745		1467.89	81.6191
	1468.86	94.8042		1468.86	88.7295		1468.86	88.5663		1468.86	81.9603
	1469.82	94.8346		1469.82	89.3991		1469.82	88.6697		1469.82	82.3909
	1470.79	94.8907		1470.79	89.8107		1470.79	88.7764		1470.79	82.7292
	1471.75	95.0203		1471.75	89.9892		1471.75	88.8827		1471.75	83.0317
	1472.71	95.148		1472.71	90.1772		1472.71	88.9808		1472.71	83.3153
	1473.68	95.2784		1473.68	90.3767		1473.68	89.0798		1473.68	83.5969
	1474.64	95.4055		1474.64	90.6347		1474.64	89.1853		1474.64	83.8812
	1475.61	95.521		1475.61	90.7857		1475.61	89.3045		1475.61	84.1475
	1476.57	95.6135		1476.57	90.9166		1476.57	89.4191		1476.57	84.4143
	1477.54	95.6842		1477.54	91.2083		1477.54	89.5139		1477.54	84.7093
	1478.5	95.8213		1478.5	91.8879		1478.5	89.7565		1478.5	85.4562
	1479.47	96.0588		1479.47	91.9457		1479.47	89.9348		1479.47	85.7017
	1480.43	95.9123		1480.43	91.6796		1480.43	89.8469		1480.43	85.4878
	1481.39	95.9671		1481.39	91.7938		1481.39	89.8561		1481.39	85.6906
	1482.36	96.035		1482.36	92.0103		1482.36	89.9885		1482.36	85.9811
	1483.32	96.3042		1483.32	92.3156		1483.32	90.3315		1483.32	86.678
	1484.29	96.3726		1484.29	92.3899		1484.29	90.3423		1484.29	86.8705
	1485.25	96.1705		1485.25	92.4306		1485.25	90.3482		1485.25	86.6162
	1486.22	96.2172		1486.22	92.5649		1486.22	90.1536		1486.22	86.6745
	1487.18	96.2686		1487.18	92.7153		1487.18	89.9951		1487.18	86.8404
	1488.15	96.3073		1488.15	92.8498		1488.15	90.0779		1488.15	87.0046
	1489.11	96.331		1489.11	92.982		1489.11	89.9704		1489.11	87.1542
	1490.07	96.3572		1490.07	93.1263		1490.07	89.8445		1490.07	87.3089
	1491.04	96.3917		1491.04	93.2751		1491.04	89.9867		1491.04	87.4788
	1492	96.4271		1492	93.3981		1492	90.4213		1492	87.6523
	1492.97	96.5005		1492.97	93.2253		1492.97	90.2551		1492.97	87.9373
	1493.93	96.5356		1493.93	93.416		1493.93	89.702		1493.93	87.9812
	1494.9	96.4704		1494.9	93.7929		1494.9	88.7448		1494.9	88.0104
	1495.86	96.4284		1495.86	93.9229		1495.86	89.0263		1495.86	88.1199
	1496.83	96.4077		1496.83	94.0426		1496.83	88.5384		1496.83	88.2191
	1497.79	96.4081		1497.79	94.1759		1497.79	88.1521		1497.79	88.3085
	1498.75	96.4052		1498.75	94.3093		1498.75	88.9992		1498.75	88.4198
	1499.72	96.4026		1499.72	94.4707		1499.72	89.5112		1499.72	88.5351
	1500.68	96.4099		1500.68	94.6922		1500.68	89.6987		1500.68	88.6403
	1501.65	96.4152		1501.65	94.7823		1501.65	90.1359		1501.65	88.7345
	1502.61	96.4545		1502.61	94.9915		1502.61	90.5137		1502.61	88.8714
	1503.58	96.5252		1503.58	95.197		1503.58	90.7807		1503.58	89.0089
	1504.54	96.4922		1504.54	95.1065		1504.54	90.5528		1504.54	88.9828
	1505.51	96.5139		1505.51	95.1961		1505.51	90.4983		1505.51	89.0391
	1506.47	96.4712		1506.47	95.2817		1506.47	90.1525		1506.47	89.0917
	1507.43	96.3838		1507.43	95.3584		1507.43	90.114		1507.43	89.1575
	1508.4	96.437		1508.4	95.4526		1508.4	90.4437		1508.4	89.2244
	1509.36	96.4483		1509.36	95.5432		1509.36	90.5728		1509.36	89.2976
	1510.33	96.4519		1510.33	95.6312		1510.33	90.7076		1510.33	89.3743
	1511.29	96.471		1511.29	95.7171		1511.29	90.8563		1511.29	89.4534
	1512.26	96.475		1512.26	95.7739		1512.26	90.9644		1512.26	89.5144
	1513.22	96.4896		1513.22	95.837		1513.22	91.0425		1513.22	89.5696
	1514.19	96.5226		1514.19	95.8861		1514.19	91.1061		1514.19	89.6064
	1515.15	96.5		1515.15	95.9054		1515.15	91.1248		1515.15	89.6345
	1516.11	96.4975		1516.11	95.9398		1516.11	91.1493		1516.11	89.6653
	1517.08	96.4925		1517.08	95.9784		1517.08	91.164		1517.08	89.692
	1518.04	96.4923		1518.04	96.0151		1518.04	91.1533		1518.04	89.7149
	1519.01	96.4643		1519.01	96.0338		1519.01	91.1188		1519.01	89.7267
	1519.97	96.4698		1519.97	96.0765		1519.97	91.1559		1519.97	89.7702
	1520.94	96.5546		1520.94	96.1553		1520.94	91.2086		1520.94	89.8147
	1521.9	96.5903		1521.9	96.2219		1521.9	91.207		1521.9	89.8522
	1522.87	96.609		1522.87	96.2722		1522.87	91.204		1522.87	89.8784
	1523.83	96.6297		1523.83	96.3144		1523.83	91.2053		1523.83	89.9056
	1524.79	96.6519		1524.79	96.3511		1524.79	91.2081		1524.79	89.929
	1525.76	96.6938		1525.76	96.3914		1525.76	91.2136		1525.76	89.9534
	1526.72	96.7321		1526.72	96.4268		1526.72	91.2058		1526.72	89.9751
	1527.69	96.7481		1527.69	96.4482		1527.69	91.2088		1527.69	90.008
	1528.65	96.7627		1528.65	96.4768		1528.65	91.2111		1528.65	90.0419
	1529.62	96.7627		1529.62	96.5192		1529.62	91.1923		1529.62	90.0832
	1530.58	96.7352		1530.58	96.7831		1530.58	91.0554		1530.58	90.2598
	1531.55	96.7532		1531.55	96.5666		1531.55	91.1478		1531.55	90.1005
	1532.51	96.745		1532.51	96.5892		1532.51	91.1365		1532.51	90.1049
	1533.47	96.7353		1533.47	96.6206		1533.47	91.1147		1533.47	90.1219
	1534.44	96.7305		1534.44	96.6576		1534.44	91.0803		1534.44	90.1418
	1535.4	96.7386		1535.4	96.7028		1535.4	91.063		1535.4	90.1543
	1536.37	96.7585		1536.37	96.7445		1536.37	91.0512		1536.37	90.1608
	1537.33	96.7723		1537.33	96.7728		1537.33	91.035		1537.33	90.1608
	1538.3	96.7735		1538.3	96.799		1538.3	91.0145		1538.3	90.1615
	1539.26	96.7774		1539.26	96.8323		1539.26	90.9915		1539.26	90.1559
	1540.23	96.7829		1540.23	96.8622		1540.23	90.9715		1540.23	90.1478
	1541.19	96.7996		1541.19	96.8884		1541.19	90.9526		1541.19	90.1375
	1542.15	96.8009		1542.15	96.905		1542.15	90.9259		1542.15	90.1185
	1543.12	96.8		1543.12	96.9188		1543.12	90.8987		1543.12	90.088
	1544.08	96.8134		1544.08	96.9353		1544.08	90.8765		1544.08	90.0547
	1545.05	96.8732		1545.05	96.9567		1545.05	90.8908		1545.05	90.0361
	1546.01	96.9671		1546.01	96.9688		1546.01	90.9634		1546.01	89.9895
	1546.98	96.7732		1546.98	96.9965		1546.98	90.8883		1546.98	89.9669
	1547.94	96.8555		1547.94	97.1817		1547.94	90.8612		1547.94	90.1884
	1548.91	96.9974		1548.91	97.027		1548.91	90.865		1548.91	89.9035
	1549.87	96.9862		1549.87	97.0402		1549.87	90.8178		1549.87	89.8545
	1550.83	96.946		1550.83	97.0549		1550.83	90.7656		1550.83	89.8072
	1551.8	96.8356		1551.8	97.0696		1551.8	90.677		1551.8	89.752
	1552.76	96.9529		1552.76	97.0754		1552.76	90.6598		1552.76	89.6907
	1553.73	96.9856		1553.73	97.0951		1553.73	90.6229		1553.73	89.6236
	1554.69	96.9492		1554.69	97.1158		1554.69	90.5568		1554.69	89.5601
	1555.66	96.9551		1555.66	97.1349		1555.66	90.5023		1555.66	89.4929
	1556.62	97.0254		1556.62	97.1487		1556.62	90.4763		1556.62	89.4367
	1557.59	97.1396		1557.59	97.1593		1557.59	90.4841		1557.59	89.393
	1558.55	97.2716		1558.55	97.175		1558.55	90.4981		1558.55	89.3334
	1559.51	97.0304		1559.51	97.1867		1559.51	90.3194		1559.51	89.2599
	1560.48	97.012		1560.48	97.1919		1560.48	90.2657		1560.48	89.1844
	1561.44	97.0005		1561.44	97.1928		1561.44	90.1905		1561.44	89.0986
	1562.41	96.9351		1562.41	97.1937		1562.41	90.0878		1562.41	89.0195
	1563.37	96.9622		1563.37	97.2002		1563.37	90.0197		1563.37	88.9532
	1564.34	97.0612		1564.34	97.2006		1564.34	90.0177		1564.34	88.8769
	1565.3	97.026		1565.3	97.195		1565.3	89.9516		1565.3	88.794
	1566.27	96.9107		1566.27	97.1908		1566.27	89.8347		1566.27	88.7111
	1567.23	96.7953		1567.23	97.1904		1567.23	89.668		1567.23	88.6231
	1568.19	97.0141		1568.19	97.191		1568.19	89.7464		1568.19	88.5366
	1569.16	97.0299		1569.16	97.1897		1569.16	89.6961		1569.16	88.4509
	1570.12	96.9799		1570.12	97.1836		1570.12	89.6223		1570.12	88.3637
	1571.09	96.8859		1571.09	97.1744		1571.09	89.4977		1571.09	88.261
	1572.05	96.7698		1572.05	97.1747		1572.05	89.3123		1572.05	88.1824
	1573.02	96.7593		1573.02	97.1571		1573.02	89.2387		1573.02	88.0873
	1573.98	96.753		1573.98	97.1489		1573.98	89.1573		1573.98	87.9598
	1574.95	96.7399		1574.95	97.1408		1574.95	89.0787		1574.95	87.8544
	1575.91	96.7275		1575.91	97.1278		1575.91	89.0008		1575.91	87.7503
	1576.87	96.7098		1576.87	97.1098		1576.87	88.9204		1576.87	87.6403
	1577.84	96.6848		1577.84	97.0912		1577.84	88.8342		1577.84	87.5264
	1578.8	96.6675		1578.8	97.0733		1578.8	88.7473		1578.8	87.4112
	1579.77	96.6516		1579.77	97.0533		1579.77	88.661		1579.77	87.2978
	1580.73	96.6301		1580.73	97.0338		1580.73	88.572		1580.73	87.1965
	1581.7	96.6065		1581.7	97.007		1581.7	88.4777		1581.7	87.0662
	1582.66	96.5798		1582.66	96.9768		1582.66	88.376		1582.66	86.9242
	1583.63	96.5588		1583.63	96.954		1583.63	88.275		1583.63	86.7968
	1584.59	96.5887		1584.59	97.0621		1584.59	88.2475		1584.59	86.8368
	1585.55	96.5716		1585.55	97.0074		1585.55	88.1614		1585.55	86.721
	1586.52	96.4456		1586.52	96.9561		1586.52	88.0349		1586.52	86.5253
	1587.48	96.3966		1587.48	96.9134		1587.48	87.917		1587.48	86.3433
	1588.45	96.4607		1588.45	96.7825		1588.45	87.7574		1588.45	86.1026
	1589.41	96.4253		1589.41	96.7403		1589.41	87.6171		1589.41	85.8995
	1590.38	96.4041		1590.38	96.7052		1590.38	87.4894		1590.38	85.7316
	1591.34	96.3865		1591.34	96.6696		1591.34	87.364		1591.34	85.5726
	1592.31	96.3713		1592.31	96.632		1592.31	87.2361		1592.31	85.4101
	1593.27	96.3578		1593.27	96.5933		1593.27	87.1026		1593.27	85.235
	1594.23	96.3418		1594.23	96.5547		1594.23	86.9584		1594.23	85.0517
	1595.2	96.3243		1595.2	96.5158		1595.2	86.8128		1595.2	84.8715
	1596.16	96.3097		1596.16	96.4778		1596.16	86.6655		1596.16	84.6877
	1597.13	96.2941		1597.13	96.438		1597.13	86.5161		1597.13	84.5051
	1598.09	96.2795		1598.09	96.3301		1598.09	86.5752		1598.09	84.5123
	1599.06	96.2674		1599.06	96.2775		1599.06	86.4514		1599.06	84.3063
	1600.02	96.25		1600.02	96.3208		1600.02	86.0484		1600.02	83.946
	1600.99	96.2425		1600.99	96.2846		1600.99	85.8415		1600.99	83.7295
	1601.95	96.2348		1601.95	96.2466		1601.95	85.6571		1601.95	83.5262
	1602.91	96.2344		1602.91	96.2088		1602.91	85.4782		1602.91	83.3207
	1603.88	96.2456		1603.88	96.1717		1603.88	85.3164		1603.88	83.1251
	1604.84	96.2419		1604.84	96.1344		1604.84	85.1621		1604.84	82.9557
	1605.81	96.2327		1605.81	96.0995		1605.81	84.9418		1605.81	82.7164
	1606.77	96.2189		1606.77	96.0644		1606.77	84.7201		1606.77	82.4901
	1607.74	96.2065		1607.74	96.0313		1607.74	84.5081		1607.74	82.2666
	1608.7	96.2006		1608.7	95.9993		1608.7	84.2939		1608.7	82.0354
	1609.67	96.2003		1609.67	95.9649		1609.67	84.0779		1609.67	81.7955
	1610.63	96.2015		1610.63	95.9285		1610.63	83.8638		1610.63	81.5705
	1611.59	96.1937		1611.59	95.8946		1611.59	83.6421		1611.59	81.4292
	1612.56	96.1893		1612.56	95.861		1612.56	83.3983		1612.56	81.1368
	1613.52	96.1856		1613.52	95.8248		1613.52	83.1513		1613.52	80.8456
	1614.49	96.1856		1614.49	95.7884		1614.49	82.9085		1614.49	80.5322
	1615.45	96.183		1615.45	95.7512		1615.45	82.6658		1615.45	80.2377
	1616.42	96.1801		1616.42	95.7155		1616.42	82.4169		1616.42	79.9633
	1617.38	96.1749		1617.38	95.6784		1617.38	82.159		1617.38	79.6892
	1618.35	96.1671		1618.35	95.6412		1618.35	81.8962		1618.35	79.4042
	1619.31	96.1593		1619.31	95.6031		1619.31	81.6274		1619.31	79.1307
	1620.27	96.1581		1620.27	95.5654		1620.27	81.3584		1620.27	78.8284
	1621.24	96.1681		1621.24	95.5261		1621.24	81.0948		1621.24	78.4642
	1622.2	96.1988		1622.2	95.4843		1622.2	80.8432		1622.2	78.0623
	1623.17	96.2118		1623.17	95.443		1623.17	80.5623		1623.17	77.7108
	1624.13	96.209		1624.13	95.4005		1624.13	80.2543		1624.13	77.3596
	1625.1	96.1971		1625.1	95.3578		1625.1	79.939		1625.1	77
	1626.06	96.1833		1626.06	95.3175		1626.06	79.6268		1626.06	76.715
	1627.03	96.1798		1627.03	95.2778		1627.03	79.2843		1627.03	76.1176
	1627.99	96.1682		1627.99	95.2403		1627.99	78.9382		1627.99	75.6417
	1628.95	96.1502		1628.95	95.2049		1628.95	78.5912		1628.95	75.2823
	1629.92	96.1147		1629.92	95.1677		1629.92	78.3809		1629.92	75.431
	1630.88	96.0448		1630.88	95.0869		1630.88	78.2113		1630.88	75.0296
	1631.85	96.1059		1631.85	95.0928		1631.85	77.8037		1631.85	74.41
	1632.81	96.1346		1632.81	95.058		1632.81	77.2139		1632.81	73.7405
	1633.78	96.1531		1633.78	95.0226		1633.78	76.7937		1633.78	72.4901
	1634.74	96.1549		1634.74	94.9842		1634.74	76.4081		1634.74	71.7715
	1635.71	96.1408		1635.71	94.9477		1635.71	76.0006		1635.71	71.1679
	1636.67	96.1276		1636.67	94.9171		1636.67	75.5915		1636.67	70.516
	1637.64	96.1221		1637.64	94.8877		1637.64	75.1905		1637.64	69.8375
	1638.6	96.129		1638.6	94.8588		1638.6	74.785		1638.6	69.2292
	1639.56	96.1593		1639.56	94.8349		1639.56	74.3667		1639.56	68.9747
	1640.53	96.1863		1640.53	94.8419		1640.53	73.9925		1640.53	68.2515
	1641.49	96.1558		1641.49	94.833		1641.49	73.5077		1641.49	67.5127
	1642.46	96.1546		1642.46	94.8101		1642.46	73.1251		1642.46	66.7225
	1643.42	96.1508		1643.42	94.7098		1643.42	72.6963		1643.42	65.9017
	1644.39	96.1658		1644.39	94.7738		1644.39	72.5985		1644.39	64.801
	1645.35	96.1683		1645.35	94.7595		1645.35	72.4331		1645.35	63.8039
	1646.32	96.1593		1646.32	94.7458		1646.32	72.1214		1646.32	62.9834
	1647.28	96.1381		1647.28	94.7357		1647.28	71.8196		1647.28	62.1849
	1648.24	96.1011		1648.24	94.728		1648.24	71.5167		1648.24	61.4197
	1649.21	96.0883		1649.21	94.7207		1649.21	71.1736		1649.21	60.606
	1650.17	96.0954		1650.17	94.7146		1650.17	70.816		1650.17	59.6956
	1651.14	96.1098		1651.14	94.7137		1651.14	70.8855		1651.14	58.9947
	1652.1	96.1282		1652.1	94.7107		1652.1	70.908		1652.1	58.3221
	1653.07	96.1227		1653.07	94.7114		1653.07	70.9224		1653.07	57.5667
	1654.03	96.0944		1654.03	94.7089		1654.03	70.6649		1654.03	56.8457
	1655	96.1048		1655	94.7073		1655	70.5689		1655	56.1419
	1655.96	96.104		1655.96	94.7055		1655.96	70.3319		1655.96	55.09
	1656.92	96.0811		1656.92	94.7023		1656.92	69.933		1656.92	53.756
	1657.89	96.0457		1657.89	94.6979		1657.89	69.3846		1657.89	53.0567
	1658.85	95.9384		1658.85	94.6685		1658.85	69.6471		1658.85	52.3633
	1659.82	95.9836		1659.82	94.726		1659.82	69.8805		1659.82	51.7689
	1660.78	96.0701		1660.78	94.7224		1660.78	70.3062		1660.78	51.3257
	1661.75	96.0906		1661.75	94.7343		1661.75	70.7999		1661.75	51.3613
	1662.71	96.095		1662.71	94.745		1662.71	70.9929		1662.71	51.3823
	1663.68	96.0823		1663.68	94.7522		1663.68	71.145		1663.68	50.9418
	1664.64	96.0405		1664.64	94.7588		1664.64	71.1493		1664.64	50.1421
	1665.6	95.961		1665.6	94.7664		1665.6	71.324		1665.6	49.8083
	1666.57	95.996		1666.57	94.7408		1666.57	71.5747		1666.57	49.4484
	1667.53	95.9866		1667.53	94.7171		1667.53	71.8503		1667.53	48.9668
	1668.5	95.9788		1668.5	94.7127		1668.5	72.1157		1668.5	49.4883
	1669.46	95.9821		1669.46	94.7133		1669.46	72.3879		1669.46	49.7553
	1670.43	96.0009		1670.43	94.7152		1670.43	72.6876		1670.43	49.4668
	1671.39	96.0063		1671.39	94.7242		1671.39	72.9518		1671.39	49.184
	1672.36	95.9919		1672.36	94.7256		1672.36	73.2666		1672.36	49.0655
	1673.32	95.9887		1673.32	94.7214		1673.32	73.509		1673.32	48.6688
	1674.28	95.9877		1674.28	94.7181		1674.28	73.9915		1674.28	49.093
	1675.25	95.9773		1675.25	94.7104		1675.25	74.4027		1675.25	50.1446
	1676.21	95.9626		1676.21	94.7005		1676.21	74.7961		1676.21	50.5895
	1677.18	95.965		1677.18	94.6918		1677.18	75.0257		1677.18	49.9648
	1678.14	95.972		1678.14	94.6901		1678.14	74.9211		1678.14	50.2119
	1679.11	95.9765		1679.11	94.672		1679.11	75.9579		1679.11	50.3148
	1680.07	95.9755		1680.07	94.6574		1680.07	76.4993		1680.07	51.4603
	1681.04	95.9724		1681.04	94.6381		1681.04	76.9867		1681.04	52.1711
	1682	95.975		1682	94.6133		1682	77.4685		1682	52.4509
	1682.96	96.0043		1682.96	94.5792		1682.96	78.0205		1682.96	53.2385
	1683.93	95.9994		1683.93	94.5367		1683.93	78.5454		1683.93	53.8233
	1684.89	95.9899		1684.89	94.488		1684.89	79.1441		1684.89	54.9341
	1685.86	95.9908		1685.86	94.4371		1685.86	79.7076		1685.86	55.5153
	1686.82	96.0015		1686.82	94.3888		1686.82	80.2379		1686.82	55.7877
	1687.79	96.0019		1687.79	94.3021		1687.79	80.8321		1687.79	56.3179
	1688.75	95.9961		1688.75	94.223		1688.75	81.4671		1688.75	57.1571
	1689.72	95.9906		1689.72	94.153		1689.72	82.0572		1689.72	57.8518
	1690.68	95.985		1690.68	94.082		1690.68	82.6605		1690.68	58.6257
	1691.64	95.9897		1691.64	94.1067		1691.64	83.372		1691.64	59.4281
	1692.61	96.0552		1692.61	94.469		1692.61	83.9608		1692.61	60.0263
	1693.57	95.9778		1693.57	93.8892		1693.57	84.4497		1693.57	60.6505
	1694.54	95.9714		1694.54	93.7323		1694.54	85.0083		1694.54	61.3157
	1695.5	95.9596		1695.5	93.6246		1695.5	85.6024		1695.5	62.0539
	1696.47	95.9313		1696.47	93.5173		1696.47	86.1854		1696.47	62.8502
	1697.43	95.9161		1697.43	93.3912		1697.43	86.7548		1697.43	63.5914
	1698.4	95.9173		1698.4	93.2593		1698.4	87.2901		1698.4	64.2213
	1699.36	95.9078		1699.36	93.1237		1699.36	87.8136		1699.36	64.8729
	1700.32	95.892		1700.32	92.9608		1700.32	88.348		1700.32	65.5925
	1701.29	95.8808		1701.29	92.8098		1701.29	88.8741		1701.29	66.353
	1702.25	95.8665		1702.25	92.6376		1702.25	89.3584		1702.25	66.9761
	1703.22	95.8376		1703.22	92.4425		1703.22	89.8376		1703.22	67.5623
	1704.18	95.8121		1704.18	92.2179		1704.18	90.2824		1704.18	68.2129
	1705.15	95.7825		1705.15	91.9947		1705.15	90.7294		1705.15	68.8614
	1706.11	95.7467		1706.11	91.7504		1706.11	91.1383		1706.11	69.5116
	1707.08	95.716		1707.08	91.5054		1707.08	91.5341		1707.08	70.236
	1708.04	95.6805		1708.04	91.3309		1708.04	92.0161		1708.04	71.246
	1709	95.6292		1709	91.2417		1709	92.5898		1709	71.8869
	1709.97	95.6003		1709.97	90.788		1709.97	92.6176		1709.97	72.1434
	1710.93	95.5739		1710.93	90.5226		1710.93	92.9508		1710.93	73.0132
	1711.9	95.5439		1711.9	90.5043		1711.9	93.5978		1711.9	73.7298
	1712.86	95.5		1712.86	89.9758		1712.86	93.5029		1712.86	74.0151
	1713.83	95.4611		1713.83	89.6269		1713.83	93.6639		1713.83	73.9412
	1714.79	95.4328		1714.79	89.3012		1714.79	93.8629		1714.79	74.225
	1715.76	95.4161		1715.76	88.9797		1715.76	94.0803		1715.76	74.6967
	1716.72	95.3987		1716.72	88.6593		1716.72	94.2846		1716.72	74.9769
	1717.68	95.3597		1717.68	88.3197		1717.68	94.459		1717.68	75.2204
	1718.65	95.3245		1718.65	87.9683		1718.65	94.6108		1718.65	75.7066
	1719.61	95.3024		1719.61	87.6269		1719.61	94.7631		1719.61	76.325
	1720.58	95.3007		1720.58	87.3013		1720.58	94.9275		1720.58	77.2385
	1721.54	95.2566		1721.54	86.8941		1721.54	95.0325		1721.54	77.275
	1722.51	95.2196		1722.51	86.5022		1722.51	95.1219		1722.51	77.2796
	1723.47	95.1927		1723.47	86.1726		1723.47	95.1898		1723.47	77.0619
	1724.44	95.1665		1724.44	85.7519		1724.44	95.3305		1724.44	77.4968
	1725.4	95.129		1725.4	85.5122		1725.4	95.8462		1725.4	77.8197
	1726.36	95.1544		1726.36	85.0974		1726.36	95.826		1726.36	77.5874
	1727.33	95.1501		1727.33	84.6612		1727.33	95.7937		1727.33	77.3568
	1728.29	95.1352		1728.29	84.2853		1728.29	95.7755		1728.29	77.1287
	1729.26	95.1203		1729.26	84.1645		1729.26	95.4298		1729.26	76.2923
	1730.22	95.1076		1730.22	83.9574		1730.22	95.3185		1730.22	75.799
	1731.19	95.0877		1731.19	83.495		1731.19	95.3213		1731.19	75.678
	1732.15	95.087		1732.15	83.3191		1732.15	95.2627		1732.15	75.3031
	1733.12	95.0831		1733.12	83.4741		1733.12	95.1329		1733.12	74.9772
	1734.08	95.0672		1734.08	83.4643		1734.08	94.8861		1734.08	74.7117
	1735.04	95.064		1735.04	83.4973		1735.04	94.7591		1735.04	74.5503
	1736.01	95.0629		1736.01	82.8735		1736.01	94.6754		1736.01	74.2165
	1736.97	95.056		1736.97	82.2965		1736.97	94.8226		1736.97	73.8188
	1737.94	95.0656		1737.94	82.3272		1737.94	94.7553		1737.94	73.4451
	1738.9	95.0746		1738.9	83.0888		1738.9	94.5626		1738.9	73.2048
	1739.87	95.069		1739.87	83.7336		1739.87	94.0974		1739.87	72.9584
	1740.83	95.0728		1740.83	83.6174		1740.83	94.3832		1740.83	72.7205
	1741.8	95.089		1741.8	83.238		1741.8	94.154		1741.8	72.1131
	1742.76	95.1019		1742.76	83.8506		1742.76	94.0251		1742.76	71.9088
	1743.72	95.1291		1743.72	84.7179		1743.72	93.1549		1743.72	71.6326
	1744.69	95.1543		1744.69	84.8438		1744.69	92.6111		1744.69	71.2221
	1745.65	95.1736		1745.65	85.2905		1745.65	92.0235		1745.65	70.7233
	1746.62	95.185		1746.62	86.2367		1746.62	91.3683		1746.62	70.8306
	1747.58	95.2525		1747.58	87.135		1747.58	90.516		1747.58	70.7889
	1748.55	95.3207		1748.55	87.8852		1748.55	89.615		1748.55	70.7635
	1749.51	95.3701		1749.51	88.6146		1749.51	88.131		1749.51	70.6315
	1750.48	95.4241		1750.48	89.1363		1750.48	87.5566		1750.48	70.5577
	1751.44	95.4759		1751.44	89.9193		1751.44	86.2247		1751.44	70.7917
	1752.4	95.5131		1752.4	90.9574		1752.4	85.4284		1752.4	70.3206
	1753.37	95.5551		1753.37	92.0032		1753.37	85.2953		1753.37	69.6626
	1754.33	95.5853		1754.33	92.8157		1754.33	85.5344		1754.33	69.8251
	1755.3	95.6829		1755.3	93.5279		1755.3	85.9727		1755.3	70.0059
	1756.26	95.7371		1756.26	93.2515		1756.26	86.6468		1756.26	70.6013
	1757.23	95.8164		1757.23	93.4787		1757.23	87.9373		1757.23	71.7049
	1758.19	95.8961		1758.19	94.4863		1758.19	89.0998		1758.19	71.6413
	1759.16	95.9789		1759.16	95.3972		1759.16	90.1742		1759.16	72.3223
	1760.12	96.074		1760.12	95.7864		1760.12	91.2973		1760.12	73.1207
	1761.08	96.1444		1761.08	95.0844		1761.08	92.2775		1761.08	73.9852
	1762.05	96.2154		1762.05	95.2718		1762.05	93.3432		1762.05	75.2206
	1763.01	96.2961		1763.01	95.8791		1763.01	94.038		1763.01	75.9159
	1763.98	96.3732		1763.98	96.6701		1763.98	94.4089		1763.98	76.4067
	1764.94	96.4874		1764.94	96.909		1764.94	94.8094		1764.94	77.1081
	1765.91	96.5945		1765.91	97.0623		1765.91	95.1367		1765.91	77.8988
	1766.87	96.6047		1766.87	97.0298		1766.87	95.3821		1766.87	78.5441
	1767.84	96.6717		1767.84	96.6845		1767.84	95.2541		1767.84	79.4696
	1768.8	96.7318		1768.8	96.8042		1768.8	95.2423		1768.8	80.3382
	1769.76	96.7951		1769.76	97.0099		1769.76	95.7225		1769.76	81.0281
	1770.73	96.8676		1770.73	97.0323		1770.73	95.53		1770.73	81.8381
	1771.69	96.9372		1771.69	97.1037		1771.69	95.7127		1771.69	82.6337
	1772.66	96.9954		1772.66	97.1714		1772.66	95.9003		1772.66	83.4277
	1773.62	97.0457		1773.62	97.244		1773.62	96.1017		1773.62	84.2636
	1774.59	97.0896		1774.59	97.3193		1774.59	96.315		1774.59	85.0181
	1775.55	97.1388		1775.55	97.3789		1775.55	96.4359		1775.55	85.753
	1776.52	97.1872		1776.52	97.4318		1776.52	96.5696		1776.52	86.7199
	1777.48	97.2345		1777.48	97.4906		1777.48	96.7074		1777.48	87.8744
	1778.44	97.2745		1778.44	97.513		1778.44	96.7321		1778.44	88.4618
	1779.41	97.3167		1779.41	97.5396		1779.41	96.8157		1779.41	88.7565
	1780.37	97.3486		1780.37	97.5654		1780.37	96.9037		1780.37	89.117
	1781.34	97.3786		1781.34	97.5961		1781.34	96.9739		1781.34	89.8379
	1782.3	97.4113		1782.3	97.6275		1782.3	97.0464		1782.3	91.2301
	1783.27	97.4343		1783.27	97.653		1783.27	97.1169		1783.27	91.663
	1784.23	97.4398		1784.23	97.6717		1784.23	97.1483		1784.23	91.6541
	1785.2	97.4449		1785.2	97.6964		1785.2	97.1796		1785.2	91.8287
	1786.16	97.4659		1786.16	97.7266		1786.16	97.2262		1786.16	93.0962
	1787.12	97.6304		1787.12	97.8485		1787.12	97.4457		1787.12	93.5914
	1788.09	97.51		1788.09	97.7794		1788.09	97.328		1788.09	93.768
	1789.05	97.5143		1789.05	97.7986		1789.05	97.355		1789.05	93.8935
	1790.02	97.5192		1790.02	97.8162		1790.02	97.3861		1790.02	93.5608
	1790.98	97.5299		1790.98	97.8358		1790.98	97.4199		1790.98	93.4968
	1791.95	97.5451		1791.95	97.8575		1791.95	97.4529		1791.95	93.6938
	1792.91	97.5577		1792.91	97.8795		1792.91	97.4827		1792.91	93.9191
	1793.88	97.5678		1793.88	97.9		1793.88	97.5073		1793.88	94.1873
	1794.84	97.58		1794.84	97.9174		1794.84	97.5317		1794.84	94.3668
	1795.8	97.5877		1795.8	97.9305		1795.8	97.5515		1795.8	94.3959
	1796.77	97.5961		1796.77	97.9445		1796.77	97.5701		1796.77	94.5409
	1797.73	97.609		1797.73	97.9597		1797.73	97.5901		1797.73	94.7611
	1798.7	97.6196		1798.7	97.9724		1798.7	97.6089		1798.7	94.8312
	1799.66	97.6184		1799.66	97.9811		1799.66	97.6195		1799.66	94.9122
	1800.63	97.6157		1800.63	97.9916		1800.63	97.6271		1800.63	94.9925
	1801.59	97.6166		1801.59	98.0038		1801.59	97.636		1801.59	95.0745
	1802.56	97.6196		1802.56	98.0162		1802.56	97.6439		1802.56	95.1647
	1803.52	97.6235		1803.52	98.028		1803.52	97.6496		1803.52	95.2595
	1804.48	97.6271		1804.48	98.0405		1804.48	97.6515		1804.48	95.3613
	1805.45	97.623		1805.45	98.0528		1805.45	97.6491		1805.45	95.4421
	1806.41	97.6285		1806.41	98.069		1806.41	97.6507		1806.41	95.5137
	1807.38	97.6337		1807.38	98.0829		1807.38	97.6547		1807.38	95.5849
	1808.34	97.6369		1808.34	98.0944		1808.34	97.6584		1808.34	95.665
	1809.31	97.6459		1809.31	98.107		1809.31	97.6634		1809.31	95.7487
	1810.27	97.6559		1810.27	98.119		1810.27	97.6694		1810.27	95.8248
	1811.24	97.6633		1811.24	98.128		1811.24	97.6741		1811.24	95.8958
	1812.2	97.6669		1812.2	98.1356		1812.2	97.6782		1812.2	95.9643
	1813.16	97.6635		1813.16	98.1424		1813.16	97.6776		1813.16	96.0291
	1814.13	97.668		1814.13	98.1554		1814.13	97.6811		1814.13	96.2111
	1815.09	97.6917		1815.09	98.1709		1815.09	97.6882		1815.09	96.2771
	1816.06	97.6974		1816.06	98.1759		1816.06	97.6973		1816.06	96.2472
	1817.02	97.7001		1817.02	98.1778		1817.02	97.7027		1817.02	96.2808
	1817.99	97.6938		1817.99	98.1794		1817.99	97.7041		1817.99	96.3325
	1818.95	97.6924		1818.95	98.1856		1818.95	97.7057		1818.95	96.3982
	1819.92	97.7413		1819.92	98.2908		1819.92	97.7016		1819.92	96.6801
	1820.88	97.6912		1820.88	98.2015		1820.88	97.7053		1820.88	96.5075
	1821.84	97.6907		1821.84	98.2105		1821.84	97.7065		1821.84	96.5357
	1822.81	97.6898		1822.81	98.2173		1822.81	97.7078		1822.81	96.5742
	1823.77	97.6867		1823.77	98.2237		1823.77	97.7071		1823.77	96.6128
	1824.74	97.6841		1824.74	98.2319		1824.74	97.7057		1824.74	96.6485
	1825.7	97.6872		1825.7	98.2407		1825.7	97.7063		1825.7	96.6874
	1826.67	97.6924		1826.67	98.2472		1826.67	97.709		1826.67	96.7228
	1827.63	97.6961		1827.63	98.2527		1827.63	97.7114		1827.63	96.7555
	1828.6	97.6971		1828.6	98.2567		1828.6	97.7129		1828.6	96.7836
	1829.56	97.6941		1829.56	98.2585		1829.56	97.7135		1829.56	96.8069
	1830.52	97.697		1830.52	98.262		1830.52	97.7196		1830.52	96.83
	1831.49	97.7026		1831.49	98.2655		1831.49	97.7292		1831.49	96.8549
	1832.45	97.6941		1832.45	98.2643		1832.45	97.7299		1832.45	96.8693
	1833.42	97.6859		1833.42	98.2633		1833.42	97.7281		1833.42	96.8807
	1834.38	97.6846		1834.38	98.2643		1834.38	97.7273		1834.38	96.8961
	1835.35	97.6814		1835.35	98.2638		1835.35	97.7272		1835.35	96.9108
	1836.31	97.677		1836.31	98.2659		1836.31	97.7288		1836.31	96.9277
	1837.28	97.6734		1837.28	98.2684		1837.28	97.7304		1837.28	96.9452
	1838.24	97.6692		1838.24	98.2713		1838.24	97.7287		1838.24	96.9614
	1839.2	97.6748		1839.2	98.2769		1839.2	97.7298		1839.2	96.9828
	1840.17	97.6794		1840.17	98.2808		1840.17	97.7311		1840.17	97.0025
	1841.13	97.674		1841.13	98.2824		1841.13	97.7294		1841.13	97.0185
	1842.1	97.6663		1842.1	98.2854		1842.1	97.7246		1842.1	97.0356
	1843.06	97.6676		1843.06	98.294		1843.06	97.7229		1843.06	97.0583
	1844.03	97.6767		1844.03	98.301		1844.03	97.7268		1844.03	97.0765
	1844.99	97.6815		1844.99	98.3023		1844.99	97.7311		1844.99	97.0913
	1845.96	97.6819		1845.96	98.3022		1845.96	97.7345		1845.96	97.1043
	1846.92	97.6838		1846.92	98.3048		1846.92	97.7385		1846.92	97.119
	1847.88	97.6835		1847.88	98.3065		1847.88	97.7412		1847.88	97.1332
	1848.85	97.6804		1848.85	98.3079		1848.85	97.7413		1848.85	97.1474
	1849.81	97.6795		1849.81	98.3105		1849.81	97.7424		1849.81	97.1646
	1850.78	97.6917		1850.78	98.3142		1850.78	97.7466		1850.78	97.1889
	1851.74	97.6908		1851.74	98.317		1851.74	97.7488		1851.74	97.2035
	1852.71	97.6896		1852.71	98.3195		1852.71	97.7523		1852.71	97.213
	1853.67	97.688		1853.67	98.3194		1853.67	97.7559		1853.67	97.2298
	1854.64	97.7178		1854.64	98.3562		1854.64	97.731		1854.64	97.2911
	1855.6	97.7431		1855.6	98.338		1855.6	97.76		1855.6	97.3164
	1856.57	97.6911		1856.57	98.3088		1856.57	97.775		1856.57	97.2565
	1857.53	97.6728		1857.53	98.3004		1857.53	97.7736		1857.53	97.2581
	1858.49	97.6741		1858.49	98.2993		1858.49	97.7765		1858.49	97.2712
	1859.46	97.6797		1859.46	98.2993		1859.46	97.7832		1859.46	97.2868
	1860.42	97.6823		1860.42	98.3		1860.42	97.7899		1860.42	97.3012
	1861.39	97.6891		1861.39	98.3029		1861.39	97.7968		1861.39	97.3174
	1862.35	97.6965		1862.35	98.3048		1862.35	97.8037		1862.35	97.3333
	1863.32	97.6985		1863.32	98.3062		1863.32	97.8084		1863.32	97.3458
	1864.28	97.6978		1864.28	98.3046		1864.28	97.8138		1864.28	97.3555
	1865.25	97.6982		1865.25	98.3021		1865.25	97.8205		1865.25	97.3656
	1866.21	97.6955		1866.21	98.2981		1866.21	97.825		1866.21	97.3736
	1867.17	97.692		1867.17	98.2952		1867.17	97.8277		1867.17	97.3798
	1868.14	97.6913		1868.14	98.2932		1868.14	97.8309		1868.14	97.3872
	1869.1	97.6897		1869.1	98.2921		1869.1	97.8343		1869.1	97.3957
	1870.07	97.6889		1870.07	98.2927		1870.07	97.8377		1870.07	97.4049
	1871.03	97.69		1871.03	98.2944		1871.03	97.8411		1871.03	97.4134
	1872	97.6908		1872	98.2958		1872	97.8444		1872	97.4201
	1872.96	97.695		1872.96	98.2953		1872.96	97.8489		1872.96	97.4297
	1873.93	97.7006		1873.93	98.2955		1873.93	97.8523		1873.93	97.4378
	1874.89	97.7544		1874.89	98.3185		1874.89	97.8706		1874.89	97.5306
	1875.85	97.7113		1875.85	98.295		1875.85	97.8668		1875.85	97.4558
	1876.82	97.7105		1876.82	98.2925		1876.82	97.8749		1876.82	97.4654
	1877.78	97.7079		1877.78	98.2852		1877.78	97.8747		1877.78	97.4653
	1878.75	97.6973		1878.75	98.2805		1878.75	97.8729		1878.75	97.4621
	1879.71	97.6985		1879.71	98.2809		1879.71	97.875		1879.71	97.4668
	1880.68	97.7018		1880.68	98.2867		1880.68	97.8725		1880.68	97.477
	1881.64	97.7219		1881.64	98.3113		1881.64	97.8249		1881.64	97.5069
	1882.61	97.7391		1882.61	98.3363		1882.61	97.8716		1882.61	97.5185
	1883.57	97.7144		1883.57	98.2988		1883.57	97.8704		1883.57	97.4957
	1884.53	97.7183		1884.53	98.3007		1884.53	97.8709		1884.53	97.5043
	1885.5	97.7186		1885.5	98.3008		1885.5	97.8699		1885.5	97.5114
	1886.46	97.7176		1886.46	98.2995		1886.46	97.8688		1886.46	97.5165
	1887.43	97.7171		1887.43	98.2973		1887.43	97.8695		1887.43	97.5221
	1888.39	97.7144		1888.39	98.2962		1888.39	97.8705		1888.39	97.5263
	1889.36	97.7129		1889.36	98.2963		1889.36	97.869		1889.36	97.5295
	1890.32	97.7125		1890.32	98.2961		1890.32	97.8662		1890.32	97.533
	1891.29	97.7122		1891.29	98.2956		1891.29	97.8646		1891.29	97.5352
	1892.25	97.7183		1892.25	98.2955		1892.25	97.8678		1892.25	97.5392
	1893.21	97.7228		1893.21	98.295		1893.21	97.8693		1893.21	97.546
	1894.18	97.7248		1894.18	98.2944		1894.18	97.871		1894.18	97.5495
	1895.14	97.7242		1895.14	98.2921		1895.14	97.872		1895.14	97.5498
	1896.11	97.722		1896.11	98.2895		1896.11	97.8708		1896.11	97.5504
	1897.07	97.7187		1897.07	98.2862		1897.07	97.869		1897.07	97.552
	1898.04	97.7164		1898.04	98.2814		1898.04	97.8677		1898.04	97.5571
	1899	97.7085		1899	98.2596		1899	97.8641		1899	97.6213
	1899.97	97.7171		1899.97	98.2759		1899.97	97.8704		1899.97	97.5859
	1900.93	97.7169		1900.93	98.276		1900.93	97.8688		1900.93	97.5819
	1901.89	97.7133		1901.89	98.2747		1901.89	97.8628		1901.89	97.5744
	1902.86	97.7143		1902.86	98.2755		1902.86	97.8589		1902.86	97.5815
	1903.82	97.7208		1903.82	98.2809		1903.82	97.8626		1903.82	97.5881
	1904.79	97.7244		1904.79	98.2854		1904.79	97.8669		1904.79	97.5957
	1905.75	97.7197		1905.75	98.2776		1905.75	97.8658		1905.75	97.6003
	1906.72	97.716		1906.72	98.2733		1906.72	97.8649		1906.72	97.6017
	1907.68	97.7157		1907.68	98.2709		1907.68	97.8657		1907.68	97.6065
	1908.65	97.72		1908.65	98.2729		1908.65	97.8668		1908.65	97.6165
	1909.61	97.7222		1909.61	98.2689		1909.61	97.8676		1909.61	97.6196
	1910.57	97.7163		1910.57	98.2597		1910.57	97.8664		1910.57	97.6154
	1911.54	97.7154		1911.54	98.257		1911.54	97.8668		1911.54	97.6143
	1912.5	97.7221		1912.5	98.2687		1912.5	97.8322		1912.5	97.6127
	1913.47	97.7505		1913.47	98.2495		1913.47	97.8644		1913.47	97.6629
	1914.43	97.727		1914.43	98.2703		1914.43	97.8687		1914.43	97.6304
	1915.4	97.729		1915.4	98.2717		1915.4	97.8701		1915.4	97.6366
	1916.36	97.7315		1916.36	98.2704		1916.36	97.8722		1916.36	97.6401
	1917.33	97.7344		1917.33	98.2722		1917.33	97.873		1917.33	97.6458
	1918.29	97.7374		1918.29	98.2771		1918.29	97.8736		1918.29	97.653
	1919.25	97.7408		1919.25	98.2807		1919.25	97.8744		1919.25	97.6598
	1920.22	97.7422		1920.22	98.2807		1920.22	97.8736		1920.22	97.6661
	1921.18	97.7432		1921.18	98.2848		1921.18	97.8713		1921.18	97.6737
	1922.15	97.7461		1922.15	98.2871		1922.15	97.8705		1922.15	97.6818
	1923.11	97.7493		1923.11	98.291		1923.11	97.8691		1923.11	97.6907
	1924.08	97.7535		1924.08	98.2963		1924.08	97.8675		1924.08	97.7015
	1925.04	97.7573		1925.04	98.3006		1925.04	97.8678		1925.04	97.7096
	1926.01	97.7709		1926.01	98.3224		1926.01	97.8726		1926.01	97.7333
	1926.97	97.7788		1926.97	98.356		1926.97	97.8755		1926.97	97.7564
	1927.93	97.7676		1927.93	98.3238		1927.93	97.8723		1927.93	97.7402
	1928.9	97.7901		1928.9	98.3422		1928.9	97.8772		1928.9	97.759
	1929.86	97.8078		1929.86	98.3859		1929.86	97.8856		1929.86	97.7849
	1930.83	97.837		1930.83	98.3986		1930.83	97.8885		1930.83	97.8002
	1931.79	97.7615		1931.79	98.3138		1931.79	97.8636		1931.79	97.7331
	1932.76	97.7562		1932.76	98.3155		1932.76	97.8605		1932.76	97.7294
	1933.72	97.7517		1933.72	98.3202		1933.72	97.8556		1933.72	97.7309
	1934.69	97.7525		1934.69	98.3318		1934.69	97.8545		1934.69	97.7419
	1935.65	97.7689		1935.65	98.3527		1935.65	97.843		1935.65	97.7587
	1936.61	97.7615		1936.61	98.3449		1936.61	97.8532		1936.61	97.765
	1937.58	97.7659		1937.58	98.3484		1937.58	97.8532		1937.58	97.7662
	1938.54	97.7644		1938.54	98.3514		1938.54	97.8521		1938.54	97.7632
	1939.51	97.7594		1939.51	98.3548		1939.51	97.8492		1939.51	97.7681
	1940.47	97.7566		1940.47	98.3556		1940.47	97.8473		1940.47	97.7721
	1941.44	97.7542		1941.44	98.3577		1941.44	97.8452		1941.44	97.7734
	1942.4	97.7507		1942.4	98.3585		1942.4	97.843		1942.4	97.774
	1943.37	97.7487		1943.37	98.3575		1943.37	97.8419		1943.37	97.7734
	1944.33	97.7451		1944.33	98.3556		1944.33	97.8395		1944.33	97.7725
	1945.29	97.7405		1945.29	98.3542		1945.29	97.8365		1945.29	97.772
	1946.26	97.7385		1946.26	98.354		1946.26	97.8353		1946.26	97.7738
	1947.22	97.74		1947.22	98.3548		1947.22	97.8369		1947.22	97.7784
	1948.19	97.7405		1948.19	98.3539		1948.19	97.8374		1948.19	97.7853
	1949.15	97.7362		1949.15	98.3527		1949.15	97.8347		1949.15	97.7869
	1950.12	97.7303		1950.12	98.3538		1950.12	97.8299		1950.12	97.7866
	1951.08	97.7289		1951.08	98.3554		1951.08	97.828		1951.08	97.7883
	1952.05	97.7481		1952.05	98.3883		1952.05	97.8539		1952.05	97.817
	1953.01	97.727		1953.01	98.3561		1953.01	97.8249		1953.01	97.7952
	1953.97	97.721		1953.97	98.354		1953.97	97.82		1953.97	97.7896
	1954.94	97.7139		1954.94	98.3528		1954.94	97.8142		1954.94	97.7844
	1955.9	97.7153		1955.9	98.3556		1955.9	97.8125		1955.9	97.7885
	1956.87	97.7203		1956.87	98.359		1956.87	97.8123		1956.87	97.7924
	1957.83	97.7242		1957.83	98.3594		1957.83	97.8116		1957.83	97.7958
	1958.8	97.7296		1958.8	98.3605		1958.8	97.8131		1958.8	97.8033
	1959.76	97.7357		1959.76	98.3643		1959.76	97.8151		1959.76	97.8131
	1960.73	97.7345		1960.73	98.366		1960.73	97.8106		1960.73	97.8123
	1961.69	97.7327		1961.69	98.367		1961.69	97.8067		1961.69	97.8149
	1962.65	97.733		1962.65	98.3696		1962.65	97.8063		1962.65	97.819
	1963.62	97.7107		1963.62	98.3573		1963.62	97.7408		1963.62	97.8241
	1964.58	97.7392		1964.58	98.372		1964.58	97.8098		1964.58	97.8218
	1965.55	97.7408		1965.55	98.373		1965.55	97.8092		1965.55	97.8248
	1966.51	97.7415		1966.51	98.3744		1966.51	97.808		1966.51	97.8261
	1967.48	97.742		1967.48	98.376		1967.48	97.8072		1967.48	97.8274
	1968.44	97.7427		1968.44	98.3773		1968.44	97.8056		1968.44	97.8303
	1969.41	97.744		1969.41	98.3783		1969.41	97.8028		1969.41	97.8343
	1970.37	97.75		1970.37	98.3799		1970.37	97.8013		1970.37	97.8403
	1971.33	97.7931		1971.33	98.4126		1971.33	97.8149		1971.33	97.848
	1972.3	97.7585		1972.3	98.3932		1972.3	97.7984		1972.3	97.8469
	1973.26	97.7639		1973.26	98.4224		1973.26	97.7568		1973.26	97.9422
	1974.23	97.7558		1974.23	98.3996		1974.23	97.7907		1974.23	97.8634
	1975.19	97.76		1975.19	98.4025		1975.19	97.7911		1975.19	97.8685
	1976.16	97.7575		1976.16	98.4007		1976.16	97.7899		1976.16	97.8427
	1977.12	97.7606		1977.12	98.4016		1977.12	97.791		1977.12	97.8445
	1978.09	97.7639		1978.09	98.4029		1978.09	97.7929		1978.09	97.8433
	1979.05	97.7764		1979.05	98.4402		1979.05	97.8299		1979.05	97.8595
	1980.01	97.7574		1980.01	98.4076		1980.01	97.793		1980.01	97.847
	1980.98	97.7352		1980.98	98.4022		1980.98	97.7898		1980.98	97.8611
	1981.94	97.773		1981.94	98.4096		1981.94	97.7852		1981.94	97.8425
	1982.91	97.8163		1982.91	98.3881		1982.91	97.771		1982.91	97.8589
	1983.87	97.7864		1983.87	98.4183		1983.87	97.7798		1983.87	97.8443
	1984.84	97.8349		1984.84	98.4807		1984.84	97.78		1984.84	97.8592
	1985.8	97.7776		1985.8	98.4217		1985.8	97.7729		1985.8	97.8418
	1986.77	97.7766		1986.77	98.4162		1986.77	97.7707		1986.77	97.8323
	1987.73	97.7748		1987.73	98.4142		1987.73	97.7657		1987.73	97.8254
	1988.69	97.7723		1988.69	98.4136		1988.69	97.7597		1988.69	97.823
	1989.66	97.7706		1989.66	98.4121		1989.66	97.7535		1989.66	97.8208
	1990.62	97.7701		1990.62	98.4107		1990.62	97.7459		1990.62	97.8187
	1991.59	97.7686		1991.59	98.4086		1991.59	97.7373		1991.59	97.816
	1992.55	97.7688		1992.55	98.4064		1992.55	97.7303		1992.55	97.8139
	1993.52	97.7708		1993.52	98.4045		1993.52	97.7238		1993.52	97.8106
	1994.48	97.7757		1994.48	98.4026		1994.48	97.719		1994.48	97.8051
	1995.45	97.8497		1995.45	98.481		1995.45	97.7419		1995.45	97.819
	1996.41	97.8196		1996.41	98.4677		1996.41	97.7764		1996.41	97.8372
	1997.37	97.8032		1997.37	98.4205		1997.37	97.758		1997.37	97.8425
	1998.34	97.8215		1998.34	98.3753		1998.34	97.742		1998.34	97.8003
	1999.3	97.7556		1999.3	98.3649		1999.3	97.6847		1999.3	97.7267
	2000.27	97.7167		2000.27	98.3917		2000.27	97.6296		2000.27	97.7838
	2001.23	97.7128		2001.23	98.4067		2001.23	97.6298		2001.23	97.8427
	2002.2	97.7309		2002.2	98.3847		2002.2	97.6531		2002.2	97.8282
	2003.16	97.7548		2003.16	98.3669		2003.16	97.605		2003.16	97.807
	2004.13	97.7478		2004.13	98.3467		2004.13	97.594		2004.13	97.8028
	2005.09	97.7875		2005.09	98.3816		2005.09	97.6418		2005.09	97.8023
	2006.05	97.7969		2006.05	98.389		2006.05	97.6429		2006.05	97.7703
	2007.02	97.7974		2007.02	98.3228		2007.02	97.6568		2007.02	97.6997
	2007.98	97.7485		2007.98	98.2775		2007.98	97.6435		2007.98	97.6968
	2008.95	97.7379		2008.95	98.3224		2008.95	97.6141		2008.95	97.7651
	2009.91	97.7827		2009.91	98.3486		2009.91	97.6293		2009.91	97.8448
	2010.88	97.8148		2010.88	98.4107		2010.88	97.6233		2010.88	97.8413
	2011.84	97.7751		2011.84	98.4397		2011.84	97.5629		2011.84	97.8611
	2012.81	97.7531		2012.81	98.4333		2012.81	97.5794		2012.81	97.8325
	2013.77	97.7738		2013.77	98.4471		2013.77	97.6123		2013.77	97.783
	2014.73	97.7997		2014.73	98.4434		2014.73	97.6112		2014.73	97.7668
	2015.7	97.763		2015.7	98.4006		2015.7	97.5933		2015.7	97.7551
	2016.66	97.4904		2016.66	98.2768		2016.66	97.4699		2016.66	97.5431
	2017.63	97.387		2017.63	98.2531		2017.63	97.3862		2017.63	97.4675
	2018.59	97.4801		2018.59	98.2354		2018.59	97.3862		2018.59	97.4852
	2019.56	97.6605		2019.56	98.2741		2019.56	97.4808		2019.56	97.6353
	2020.52	97.7749		2020.52	98.3712		2020.52	97.5887		2020.52	97.7984
	2021.49	97.7144		2021.49	98.4202		2021.49	97.5377		2021.49	97.7728
	2022.45	97.6389		2022.45	98.4377		2022.45	97.4578		2022.45	97.6976
	2023.41	97.6853		2023.41	98.3702		2023.41	97.5099		2023.41	97.6786
	2024.38	97.8227		2024.38	98.347		2024.38	97.6049		2024.38	97.7522
	2025.34	97.8396		2025.34	98.3805		2025.34	97.6308		2025.34	97.7693
	2026.31	97.8036		2026.31	98.3855		2026.31	97.5918		2026.31	97.7339
	2027.27	97.7515		2027.27	98.3881		2027.27	97.5804		2027.27	97.7171
	2028.24	97.7564		2028.24	98.4439		2028.24	97.634		2028.24	97.7428
	2029.2	97.7887		2029.2	98.3829		2029.2	97.6519		2029.2	97.8143
	2030.17	97.791		2030.17	98.3587		2030.17	97.6249		2030.17	97.8156
	2031.13	97.7096		2031.13	98.3658		2031.13	97.5668		2031.13	97.7298
	2032.09	97.6781		2032.09	98.3576		2032.09	97.5482		2032.09	97.695
	2033.06	97.6981		2033.06	98.4231		2033.06	97.5929		2033.06	97.7175
	2034.02	97.726		2034.02	98.4665		2034.02	97.6167		2034.02	97.7332
	2034.99	97.7697		2034.99	98.4846		2034.99	97.6743		2034.99	97.7723
	2035.95	97.7684		2035.95	98.4178		2035.95	97.6843		2035.95	97.7453
	2036.92	97.741		2036.92	98.3401		2036.92	97.6018		2036.92	97.6814
	2037.88	97.7462		2037.88	98.2934		2037.88	97.5689		2037.88	97.7144
	2038.85	97.7547		2038.85	98.2952		2038.85	97.6057		2038.85	97.7789
	2039.81	97.7989		2039.81	98.3484		2039.81	97.6539		2039.81	97.7781
	2040.77	97.6501		2040.77	98.316		2040.77	97.5205		2040.77	97.6326
	2041.74	97.4423		2041.74	98.2551		2041.74	97.3753		2041.74	97.535
	2042.7	97.595		2042.7	98.3545		2042.7	97.4698		2042.7	97.6324
	2043.67	97.7234		2043.67	98.4266		2043.67	97.5353		2043.67	97.6503
	2044.63	97.7352		2044.63	98.3935		2044.63	97.5474		2044.63	97.7157
	2045.6	97.7136		2045.6	98.3499		2045.6	97.5605		2045.6	97.7498
	2046.56	97.695		2046.56	98.3625		2046.56	97.5628		2046.56	97.7436
	2047.53	97.7555		2047.53	98.384		2047.53	97.581		2047.53	97.7729
	2048.49	97.7827		2048.49	98.3905		2048.49	97.6393		2048.49	97.8319
	2049.45	97.7985		2049.45	98.3898		2049.45	97.6953		2049.45	97.8091
	2050.42	97.8207		2050.42	98.3864		2050.42	97.6925		2050.42	97.7315
	2051.38	97.8156		2051.38	98.3981		2051.38	97.6651		2051.38	97.7401
	2052.35	97.7752		2052.35	98.3967		2052.35	97.6375		2052.35	97.8051
	2053.31	97.7545		2053.31	98.3656		2053.31	97.675		2053.31	97.7948
	2054.28	97.7036		2054.28	98.3106		2054.28	97.6737		2054.28	97.8045
	2055.24	97.7256		2055.24	98.2981		2055.24	97.6534		2055.24	97.7782
	2056.21	97.7588		2056.21	98.3364		2056.21	97.6185		2056.21	97.7673
	2057.17	97.7003		2057.17	98.3835		2057.17	97.5827		2057.17	97.8146
	2058.13	97.7056		2058.13	98.3687		2058.13	97.5905		2058.13	97.816
	2059.1	97.7191		2059.1	98.303		2059.1	97.5731		2059.1	97.7667
	2060.06	97.6526		2060.06	98.2986		2060.06	97.4756		2060.06	97.7246
	2061.03	97.6577		2061.03	98.3232		2061.03	97.4455		2061.03	97.6732
	2061.99	97.7388		2061.99	98.4261		2061.99	97.5623		2061.99	97.7059
	2062.96	97.7226		2062.96	98.4426		2062.96	97.5892		2062.96	97.7689
	2063.92	97.6775		2063.92	98.3756		2063.92	97.5253		2063.92	97.6885
	2064.89	97.5803		2064.89	98.2634		2064.89	97.415		2064.89	97.4959
	2065.85	97.5884		2065.85	98.2504		2065.85	97.4143		2065.85	97.5309
	2066.81	97.7246		2066.81	98.2969		2066.81	97.4991		2066.81	97.6777
	2067.78	97.7814		2067.78	98.3067		2067.78	97.5463		2067.78	97.7411
	2068.74	97.7508		2068.74	98.3212		2068.74	97.5019		2068.74	97.7263
	2069.71	97.7403		2069.71	98.3291		2069.71	97.4715		2069.71	97.7329
	2070.67	97.7929		2070.67	98.3207		2070.67	97.475		2070.67	97.7325
	2071.64	97.7742		2071.64	98.2782		2071.64	97.5339		2071.64	97.7702
	2072.6	97.7474		2072.6	98.2953		2072.6	97.5636		2072.6	97.7627
	2073.57	97.7469		2073.57	98.3609		2073.57	97.4873		2073.57	97.7162
	2074.53	97.7325		2074.53	98.3945		2074.53	97.4336		2074.53	97.7007
	2075.5	97.7282		2075.5	98.3321		2075.5	97.3989		2075.5	97.6973
	2076.46	97.7109		2076.46	98.3709		2076.46	97.4004		2076.46	97.7085
	2077.42	97.7227		2077.42	98.4576		2077.42	97.413		2077.42	97.7097
	2078.39	97.7207		2078.39	98.3881		2078.39	97.4223		2078.39	97.6848
	2079.35	97.7387		2079.35	98.3193		2079.35	97.472		2079.35	97.6734
	2080.32	97.7983		2080.32	98.3421		2080.32	97.4995		2080.32	97.7055
	2081.28	97.8009		2081.28	98.3451		2081.28	97.4943		2081.28	97.7156
	2082.25	97.7508		2082.25	98.3425		2082.25	97.4652		2082.25	97.6838
	2083.21	97.6992		2083.21	98.3476		2083.21	97.4117		2083.21	97.669
	2084.18	97.7304		2084.18	98.4027		2084.18	97.4608		2084.18	97.7093
	2085.14	97.7828		2085.14	98.4297		2085.14	97.4783		2085.14	97.7283
	2086.1	97.7501		2086.1	98.399		2086.1	97.4164		2086.1	97.6739
	2087.07	97.737		2087.07	98.34		2087.07	97.3691		2087.07	97.6404
	2088.03	97.7879		2088.03	98.3171		2088.03	97.375		2088.03	97.5784
	2089	97.7635		2089	98.3412		2089	97.3843		2089	97.5161
	2089.96	97.5856		2089.96	98.3233		2089.96	97.2563		2089.96	97.4745
	2090.93	97.5846		2090.93	98.3493		2090.93	97.2258		2090.93	97.5439
	2091.89	97.6678		2091.89	98.4107		2091.89	97.2906		2091.89	97.617
	2092.86	97.7272		2092.86	98.4366		2092.86	97.3705		2092.86	97.6471
	2093.82	97.7956		2093.82	98.4235		2093.82	97.3662		2093.82	97.6381
	2094.78	97.8001		2094.78	98.4057		2094.78	97.3397		2094.78	97.6362
	2095.75	97.7742		2095.75	98.4305		2095.75	97.3452		2095.75	97.679
	2096.71	97.8081		2096.71	98.4253		2096.71	97.3405		2096.71	97.7429
	2097.68	97.8327		2097.68	98.407		2097.68	97.3162		2097.68	97.7178
	2098.64	97.8318		2098.64	98.373		2098.64	97.338		2098.64	97.6615
	2099.61	97.8269		2099.61	98.3854		2099.61	97.3938		2099.61	97.6728
	2100.57	97.8297		2100.57	98.423		2100.57	97.413		2100.57	97.7161
	2101.54	97.8094		2101.54	98.3798		2101.54	97.3337		2101.54	97.7398
	2102.5	97.7749		2102.5	98.3854		2102.5	97.2975		2102.5	97.6832
	2103.46	97.7365		2103.46	98.3974		2103.46	97.2846		2103.46	97.6319
	2104.43	97.7713		2104.43	98.376		2104.43	97.3244		2104.43	97.6823
	2105.39	97.7529		2105.39	98.3847		2105.39	97.3292		2105.39	97.6718
	2106.36	97.7442		2106.36	98.3843		2106.36	97.3116		2106.36	97.6417
	2107.32	97.7698		2107.32	98.4061		2107.32	97.337		2107.32	97.643
	2108.29	97.7828		2108.29	98.4561		2108.29	97.3443		2108.29	97.6681
	2109.25	97.7712		2109.25	98.4568		2109.25	97.3526		2109.25	97.6515
	2110.22	97.7609		2110.22	98.4272		2110.22	97.3189		2110.22	97.6631
	2111.18	97.7612		2111.18	98.385		2111.18	97.3071		2111.18	97.6458
	2112.14	97.7232		2112.14	98.3475		2112.14	97.321		2112.14	97.6214
	2113.11	97.6832		2113.11	98.3481		2113.11	97.2819		2113.11	97.6309
	2114.07	97.669		2114.07	98.3747		2114.07	97.2088		2114.07	97.5353
	2115.04	97.6353		2115.04	98.4038		2115.04	97.1517		2115.04	97.4918
	2116	97.6601		2116	98.4306		2116	97.1869		2116	97.5265
	2116.97	97.7058		2116.97	98.4235		2116.97	97.2937		2116.97	97.5694
	2117.93	97.7165		2117.93	98.3834		2117.93	97.3403		2117.93	97.5909
	2118.9	97.7401		2118.9	98.3937		2118.9	97.3512		2118.9	97.6048
	2119.86	97.719		2119.86	98.4214		2119.86	97.3002		2119.86	97.6161
	2120.82	97.7096		2120.82	98.3855		2120.82	97.2886		2120.82	97.622
	2121.79	97.7347		2121.79	98.3874		2121.79	97.3383		2121.79	97.6255
	2122.75	97.7465		2122.75	98.4395		2122.75	97.315		2122.75	97.5949
	2123.72	97.7488		2123.72	98.4048		2123.72	97.2889		2123.72	97.6158
	2124.68	97.7349		2124.68	98.3794		2124.68	97.2533		2124.68	97.6385
	2125.65	97.7655		2125.65	98.3688		2125.65	97.2481		2125.65	97.6462
	2126.61	97.768		2126.61	98.3266		2126.61	97.2692		2126.61	97.6085
	2127.58	97.6909		2127.58	98.3177		2127.58	97.2402		2127.58	97.5789
	2128.54	97.7025		2128.54	98.3003		2128.54	97.2012		2128.54	97.5668
	2129.5	97.7717		2129.5	98.2544		2129.5	97.2511		2129.5	97.5577
	2130.47	97.7755		2130.47	98.2659		2130.47	97.2759		2130.47	97.5297
	2131.43	97.7739		2131.43	98.3009		2131.43	97.2958		2131.43	97.5581
	2132.4	97.7502		2132.4	98.3136		2132.4	97.2671		2132.4	97.5724
	2133.36	97.715		2133.36	98.4039		2133.36	97.2207		2133.36	97.5322
	2134.33	97.744		2134.33	98.4983		2134.33	97.2677		2134.33	97.5243
	2135.29	97.7245		2135.29	98.4375		2135.29	97.2703		2135.29	97.5341
	2136.26	97.6224		2136.26	98.3337		2136.26	97.1988		2136.26	97.5128
	2137.22	97.6917		2137.22	98.3222		2137.22	97.1898		2137.22	97.4958
	2138.18	97.7407		2138.18	98.3467		2138.18	97.2103		2138.18	97.4635
	2139.15	97.7423		2139.15	98.3674		2139.15	97.2031		2139.15	97.412
	2140.11	97.7983		2140.11	98.3454		2140.11	97.183		2140.11	97.4684
	2141.08	97.8153		2141.08	98.2951		2141.08	97.1837		2141.08	97.5826
	2142.04	97.8299		2142.04	98.3199		2142.04	97.2401		2142.04	97.5503
	2143.01	97.7759		2143.01	98.3903		2143.01	97.2133		2143.01	97.4652
	2143.97	97.6743		2143.97	98.4006		2143.97	97.0991		2143.97	97.4429
	2144.94	97.6739		2144.94	98.3325		2144.94	97.1002		2144.94	97.5075
	2145.9	97.7745		2145.9	98.2807		2145.9	97.148		2145.9	97.5653
	2146.86	97.8562		2146.86	98.2367		2146.86	97.1588		2146.86	97.5566
	2147.83	97.8456		2147.83	98.2599		2147.83	97.1496		2147.83	97.4988
	2148.79	97.8374		2148.79	98.3605		2148.79	97.1766		2148.79	97.4645
	2149.76	97.8565		2149.76	98.3576		2149.76	97.2176		2149.76	97.4542
	2150.72	97.7792		2150.72	98.3273		2150.72	97.1835		2150.72	97.4595
	2151.69	97.6902		2151.69	98.3896		2151.69	97.1531		2151.69	97.4691
	2152.65	97.687		2152.65	98.3617		2152.65	97.1408		2152.65	97.5194
	2153.62	97.7463		2153.62	98.2766		2153.62	97.1125		2153.62	97.5119
	2154.58	97.7528		2154.58	98.3757		2154.58	97.0846		2154.58	97.4449
	2155.54	97.7689		2155.54	98.4219		2155.54	97.1186		2155.54	97.3796
	2156.51	97.7583		2156.51	98.3584		2156.51	97.1802		2156.51	97.329
	2157.47	97.7561		2157.47	98.3175		2157.47	97.1989		2157.47	97.3494
	2158.44	97.7586		2158.44	98.3297		2158.44	97.1985		2158.44	97.4571
	2159.4	97.7857		2159.4	98.3541		2159.4	97.2359		2159.4	97.5025
	2160.37	97.7584		2160.37	98.3073		2160.37	97.2144		2160.37	97.4926
	2161.33	97.6638		2161.33	98.2545		2161.33	97.1602		2161.33	97.4788
	2162.3	97.6364		2162.3	98.3014		2162.3	97.0864		2162.3	97.4882
	2163.26	97.6905		2163.26	98.3597		2163.26	97.0901		2163.26	97.4881
	2164.22	97.7674		2164.22	98.3775		2164.22	97.1511		2164.22	97.4505
	2165.19	97.7707		2165.19	98.3676		2165.19	97.173		2165.19	97.4329
	2166.15	97.7358		2166.15	98.3595		2166.15	97.1737		2166.15	97.4524
	2167.12	97.7519		2167.12	98.3484		2167.12	97.1655		2167.12	97.4334
	2168.08	97.7512		2168.08	98.3426		2168.08	97.126		2168.08	97.4375
	2169.05	97.7265		2169.05	98.3364		2169.05	97.1081		2169.05	97.3969
	2170.01	97.7086		2170.01	98.415		2170.01	97.1688		2170.01	97.3785
	2170.98	97.7141		2170.98	98.4149		2170.98	97.1635		2170.98	97.4316
	2171.94	97.7264		2171.94	98.3321		2171.94	97.1783		2171.94	97.4139
	2172.9	97.7041		2172.9	98.3627		2172.9	97.1756		2172.9	97.3679
	2173.87	97.697		2173.87	98.3707		2173.87	97.1311		2173.87	97.3867
	2174.83	97.6783		2174.83	98.3277		2174.83	97.0753		2174.83	97.4008
	2175.8	97.7062		2175.8	98.3166		2175.8	97.0715		2175.8	97.4258
	2176.76	97.7259		2176.76	98.3146		2176.76	97.0861		2176.76	97.4029
	2177.73	97.7106		2177.73	98.3621		2177.73	97.067		2177.73	97.4314
	2178.69	97.7539		2178.69	98.3714		2178.69	97.1126		2178.69	97.4502
	2179.66	97.7694		2179.66	98.3662		2179.66	97.1555		2179.66	97.3766
	2180.62	97.7273		2180.62	98.3851		2180.62	97.1318		2180.62	97.3388
	2181.58	97.7121		2181.58	98.3493		2181.58	97.103		2181.58	97.3573
	2182.55	97.7736		2182.55	98.3597		2182.55	97.1312		2182.55	97.3244
	2183.51	97.801		2183.51	98.3893		2183.51	97.1416		2183.51	97.3079
	2184.48	97.8273		2184.48	98.4304		2184.48	97.0756		2184.48	97.3433
	2185.44	97.8063		2185.44	98.437		2185.44	97.0789		2185.44	97.4044
	2186.41	97.7304		2186.41	98.3542		2186.41	97.0677		2186.41	97.4087
	2187.37	97.6875		2187.37	98.3071		2187.37	97.0301		2187.37	97.3606
	2188.34	97.7443		2188.34	98.3873		2188.34	97.0722		2188.34	97.304
	2189.3	97.7742		2189.3	98.4281		2189.3	97.1134		2189.3	97.318
	2190.26	97.8339		2190.26	98.3947		2190.26	97.152		2190.26	97.3679
	2191.23	97.8329		2191.23	98.3499		2191.23	97.1539		2191.23	97.4053
	2192.19	97.7153		2192.19	98.2937		2192.19	97.0624		2192.19	97.3421
	2193.16	97.6634		2193.16	98.2774		2193.16	96.9862		2193.16	97.3452
	2194.12	97.6994		2194.12	98.2676		2194.12	96.9544		2194.12	97.3796
	2195.09	97.7237		2195.09	98.3443		2195.09	96.9816		2195.09	97.3535
	2196.05	97.7266		2196.05	98.4055		2196.05	97.0198		2196.05	97.3168
	2197.02	97.7105		2197.02	98.3813		2197.02	96.9796		2197.02	97.3405
	2197.98	97.6929		2197.98	98.4058		2197.98	96.9781		2197.98	97.3379
	2198.94	97.6843		2198.94	98.426		2198.94	97.0081		2198.94	97.3307
	2199.91	97.7125		2199.91	98.3353		2199.91	97.0055		2199.91	97.3584
	2200.87	97.76		2200.87	98.2924		2200.87	97.0423		2200.87	97.3152
	2201.84	97.7591		2201.84	98.3446		2201.84	97.0435		2201.84	97.3136
	2202.8	97.7333		2202.8	98.3714		2202.8	97.0559		2202.8	97.3221
	2203.77	97.7206		2203.77	98.364		2203.77	97.0788		2203.77	97.2544
	2204.73	97.6924		2204.73	98.3647		2204.73	97.0511		2204.73	97.2688
	2205.7	97.7171		2205.7	98.2654		2205.7	97.0131		2205.7	97.2704
	2206.66	97.7368		2206.66	98.2794		2206.66	96.9834		2206.66	97.2695
	2207.62	97.7231		2207.62	98.3204		2207.62	96.9938		2207.62	97.3021
	2208.59	97.7449		2208.59	98.3727		2208.59	97.0098		2208.59	97.3357
	2209.55	97.7531		2209.55	98.4074		2209.55	97.0092		2209.55	97.3333
	2210.52	97.7338		2210.52	98.3703		2210.52	97.0139		2210.52	97.3304
	2211.48	97.6688		2211.48	98.3071		2211.48	96.9674		2211.48	97.3659
	2212.45	97.6752		2212.45	98.3261		2212.45	96.929		2212.45	97.3473
	2213.41	97.7424		2213.41	98.3239		2213.41	96.9668		2213.41	97.3394
	2214.38	97.732		2214.38	98.3591		2214.38	96.9603		2214.38	97.3141
	2215.34	97.674		2215.34	98.3479		2215.34	96.8985		2215.34	97.2934
	2216.3	97.6466		2216.3	98.3179		2216.3	96.9415		2216.3	97.2937
	2217.27	97.697		2217.27	98.3734		2217.27	96.991		2217.27	97.2484
	2218.23	97.7377		2218.23	98.4016		2218.23	96.9744		2218.23	97.2429
	2219.2	97.7141		2219.2	98.3747		2219.2	97.0181		2219.2	97.2825
	2220.16	97.7381		2220.16	98.3592		2220.16	97.0693		2220.16	97.2524
	2221.13	97.7521		2221.13	98.3802		2221.13	96.9951		2221.13	97.2106
	2222.09	97.6814		2222.09	98.3584		2222.09	96.8931		2222.09	97.2216
	2223.06	97.7035		2223.06	98.3328		2223.06	96.9082		2223.06	97.2276
	2224.02	97.7516		2224.02	98.329		2224.02	96.9331		2224.02	97.2122
	2224.98	97.7665		2224.98	98.3534		2224.98	96.9222		2224.98	97.1895
	2225.95	97.7416		2225.95	98.3465		2225.95	96.8623		2225.95	97.1936
	2226.91	97.7026		2226.91	98.3679		2226.91	96.8569		2226.91	97.1878
	2227.88	97.6531		2227.88	98.4082		2227.88	96.8437		2227.88	97.1753
	2228.84	97.7203		2228.84	98.456		2228.84	96.8488		2228.84	97.1446
	2229.81	97.8096		2229.81	98.451		2229.81	96.8724		2229.81	97.1192
	2230.77	97.8351		2230.77	98.4325		2230.77	96.881		2230.77	97.1139
	2231.74	97.7775		2231.74	98.4703		2231.74	96.8562		2231.74	97.1039
	2232.7	97.7465		2232.7	98.4281		2232.7	96.8878		2232.7	97.1046
	2233.66	97.7689		2233.66	98.3726		2233.66	96.9203		2233.66	97.0989
	2234.63	97.7945		2234.63	98.3944		2234.63	96.8911		2234.63	97.0721
	2235.59	97.757		2235.59	98.4028		2235.59	96.843		2235.59	97.062
	2236.56	97.782		2236.56	98.4052		2236.56	96.7955		2236.56	97.1076
	2237.52	97.8139		2237.52	98.4083		2237.52	96.8181		2237.52	97.1139
	2238.49	97.8307		2238.49	98.389		2238.49	96.7985		2238.49	97.0593
	2239.45	97.7879		2239.45	98.3446		2239.45	96.7152		2239.45	97.0122
	2240.42	97.7003		2240.42	98.3263		2240.42	96.6434		2240.42	96.9767
	2241.38	97.6981		2241.38	98.38		2241.38	96.6595		2241.38	96.9746
	2242.34	97.6928		2242.34	98.3862		2242.34	96.7331		2242.34	96.9843
	2243.31	97.7558		2243.31	98.3856		2243.31	96.8291		2243.31	96.9618
	2244.27	97.7855		2244.27	98.4087		2244.27	96.8054		2244.27	97.0241
	2245.24	97.799		2245.24	98.4245		2245.24	96.7363		2245.24	97.0267
	2246.2	97.8443		2246.2	98.3743		2246.2	96.7291		2246.2	97.0228
	2247.17	97.791		2247.17	98.2894		2247.17	96.7		2247.17	97.0127
	2248.13	97.7384		2248.13	98.2919		2248.13	96.6377		2248.13	97.0064
	2249.1	97.7464		2249.1	98.3402		2249.1	96.5969		2249.1	97.0039
	2250.06	97.7573		2250.06	98.3148		2250.06	96.6278		2250.06	96.973
	2251.02	97.7507		2251.02	98.3128		2251.02	96.6264		2251.02	96.932
	2251.99	97.7522		2251.99	98.3157		2251.99	96.6154		2251.99	96.9217
	2252.95	97.7533		2252.95	98.3239		2252.95	96.608		2252.95	96.9134
	2253.92	97.7556		2253.92	98.3243		2253.92	96.603		2253.92	96.9064
	2254.88	97.7569		2254.88	98.3176		2254.88	96.5962		2254.88	96.9
	2255.85	97.7592		2255.85	98.3112		2255.85	96.586		2255.85	96.8922
	2256.81	97.7587		2256.81	98.3048		2256.81	96.5716		2256.81	96.8826
	2257.78	97.7548		2257.78	98.2963		2257.78	96.5568		2257.78	96.8703
	2258.74	97.7522		2258.74	98.2883		2258.74	96.5443		2258.74	96.8596
	2259.7	97.7503		2259.7	98.2846		2259.7	96.5331		2259.7	96.8497
	2260.67	97.7518		2260.67	98.2833		2260.67	96.5244		2260.67	96.8404
	2261.63	97.7541		2261.63	98.279		2261.63	96.5171		2261.63	96.8297
	2262.6	97.7546		2262.6	98.275		2262.6	96.51		2262.6	96.818
	2263.56	97.754		2263.56	98.2739		2263.56	96.5018		2263.56	96.8062
	2264.53	97.7548		2264.53	98.2734		2264.53	96.4941		2264.53	96.7947
	2265.49	97.7549		2265.49	98.2713		2265.49	96.4864		2265.49	96.7841
	2266.46	97.7544		2266.46	98.2646		2266.46	96.4781		2266.46	96.7754
	2267.42	97.7544		2267.42	98.2587		2267.42	96.4694		2267.42	96.7687
	2268.38	97.757		2268.38	98.255		2268.38	96.4631		2268.38	96.7626
	2269.35	97.7584		2269.35	98.2512		2269.35	96.4573		2269.35	96.7536
	2270.31	97.7577		2270.31	98.248		2270.31	96.4502		2270.31	96.7429
	2271.28	97.7561		2271.28	98.2469		2271.28	96.442		2271.28	96.7336
	2272.24	97.7558		2272.24	98.2457		2272.24	96.4349		2272.24	96.7228
	2273.21	97.7549		2273.21	98.2432		2273.21	96.429		2273.21	96.7101
	2274.17	97.753		2274.17	98.2382		2274.17	96.4214		2274.17	96.6953
	2275.14	97.7517		2275.14	98.2366		2275.14	96.4127		2275.14	96.6815
	2276.1	97.7504		2276.1	98.2342		2276.1	96.4038		2276.1	96.6693
	2277.06	97.7463		2277.06	98.229		2277.06	96.3946		2277.06	96.6566
	2278.03	97.7459		2278.03	98.2198		2278.03	96.3849		2278.03	96.6426
	2278.99	97.7442		2278.99	98.2065		2278.99	96.3732		2278.99	96.6269
	2279.96	97.7431		2279.96	98.1979		2279.96	96.3625		2279.96	96.6102
	2280.92	97.7422		2280.92	98.191		2280.92	96.3526		2280.92	96.5901
	2281.89	97.7389		2281.89	98.1829		2281.89	96.3431		2281.89	96.5698
	2282.85	97.7325		2282.85	98.1776		2282.85	96.3341		2282.85	96.5519
	2283.82	97.7292		2283.82	98.1698		2283.82	96.325		2283.82	96.5326
	2284.78	97.7273		2284.78	98.1621		2284.78	96.3159		2284.78	96.5105
	2285.74	97.7168		2285.74	98.1518		2285.74	96.3042		2285.74	96.4839
	2286.71	97.7015		2286.71	98.1436		2286.71	96.2892		2286.71	96.4591
	2287.67	97.6877		2287.67	98.1352		2287.67	96.2744		2287.67	96.4353
	2288.64	97.6748		2288.64	98.1225		2288.64	96.2615		2288.64	96.4122
	2289.6	97.6636		2289.6	98.107		2289.6	96.2478		2289.6	96.3875
	2290.57	97.6508		2290.57	98.0979		2290.57	96.2325		2290.57	96.3606
	2291.53	97.6384		2291.53	98.0922		2291.53	96.217		2291.53	96.3335
	2292.5	97.6163		2292.5	98.0838		2292.5	96.1971		2292.5	96.2991
	2293.46	97.5977		2293.46	98.0732		2293.46	96.1784		2293.46	96.2649
	2294.43	97.5723		2294.43	98.0607		2294.43	96.1553		2294.43	96.2301
	2295.39	97.5529		2295.39	98.0471		2295.39	96.1347		2295.39	96.1957
	2296.35	97.5329		2296.35	98.0307		2296.35	96.1166		2296.35	96.1576
	2297.32	97.5163		2297.32	98.0137		2297.32	96.0999		2297.32	96.1235
	2298.28	97.4912		2298.28	98.0007		2298.28	96.079		2298.28	96.0889
	2299.25	97.4652		2299.25	97.9908		2299.25	96.0571		2299.25	96.0553
	2300.21	97.4375		2300.21	97.9833		2300.21	96.0367		2300.21	96.0214
	2301.18	97.4077		2301.18	97.9744		2301.18	96.0182		2301.18	95.9838
	2302.14	97.3842		2302.14	97.9721		2302.14	96.0019		2302.14	95.9461
	2303.11	97.3632		2303.11	97.9692		2303.11	95.984		2303.11	95.9048
	2304.07	97.3419		2304.07	97.9648		2304.07	95.9667		2304.07	95.8596
	2305.03	97.3161		2305.03	97.9615		2305.03	95.9482		2305.03	95.8163
	2306	97.2882		2306	97.9607		2306	95.927		2306	95.7821
	2306.96	97.2593		2306.96	97.9589		2306.96	95.9043		2306.96	95.7527
	2307.93	97.2425		2307.93	97.9599		2307.93	95.8849		2307.93	95.7228
	2308.89	97.2181		2308.89	97.9673		2308.89	95.866		2308.89	95.692
	2309.86	97.1961		2309.86	97.9795		2309.86	95.8517		2309.86	95.6672
	2310.82	97.1682		2310.82	97.9851		2310.82	95.8324		2310.82	95.6361
	2311.79	97.1593		2311.79	97.9857		2311.79	95.8126		2311.79	95.6101
	2312.75	97.1608		2312.75	97.9888		2312.75	95.7955		2312.75	95.5831
	2313.71	97.1669		2313.71	97.9983		2313.71	95.7837		2313.71	95.5598
	2314.68	97.1711		2314.68	98.0113		2314.68	95.767		2314.68	95.5367
	2315.64	97.171		2315.64	98.0224		2315.64	95.7507		2315.64	95.5211
	2316.61	97.1678		2316.61	98.0362		2316.61	95.7358		2316.61	95.5142
	2317.57	97.1626		2317.57	98.0528		2317.57	95.7176		2317.57	95.5058
	2318.54	97.171		2318.54	98.0738		2318.54	95.7054		2318.54	95.492
	2319.5	97.1826		2319.5	98.0884		2319.5	95.6976		2319.5	95.4723
	2320.47	97.2007		2320.47	98.1064		2320.47	95.6926		2320.47	95.4674
	2321.43	97.2177		2321.43	98.1298		2321.43	95.6868		2321.43	95.4673
	2322.39	97.2469		2322.39	98.1498		2322.39	95.6856		2322.39	95.4757
	2323.36	97.2856		2323.36	98.1595		2323.36	95.6895		2323.36	95.4803
	2324.32	97.3324		2324.32	98.1728		2324.32	95.6978		2324.32	95.4802
	2325.29	97.3738		2325.29	98.1939		2325.29	95.7034		2325.29	95.4844
	2326.25	97.4163		2326.25	98.2107		2326.25	95.7049		2326.25	95.4927
	2327.22	97.4642		2327.22	98.2221		2327.22	95.7044		2327.22	95.496
	2328.18	97.516		2328.18	98.2152		2328.18	95.6997		2328.18	95.497
	2329.15	97.5627		2329.15	98.2043		2329.15	95.6972		2329.15	95.4947
	2330.11	97.5998		2330.11	98.1912		2330.11	95.6958		2330.11	95.5106
	2331.07	97.6392		2331.07	98.1736		2331.07	95.6934		2331.07	95.5208
	2332.04	97.6666		2332.04	98.1548		2332.04	95.6848		2332.04	95.5132
	2333	97.6859		2333	98.1476		2333	95.6753		2333	95.5054
	2333.97	97.6971		2333.97	98.1309		2333.97	95.6624		2333.97	95.4991
	2334.93	97.7222		2334.93	98.1019		2334.93	95.6541		2334.93	95.4939
	2335.9	97.7491		2335.9	98.0705		2335.9	95.645		2335.9	95.478
	2336.86	97.7831		2336.86	98.0506		2336.86	95.6414		2336.86	95.4612
	2337.83	97.7985		2337.83	98.0444		2337.83	95.6373		2337.83	95.4505
	2338.79	97.802		2338.79	98.0442		2338.79	95.6282		2338.79	95.4432
	2339.75	97.8178		2339.75	98.0437		2339.75	95.6202		2339.75	95.43
	2340.72	97.8421		2340.72	98.0447		2340.72	95.6205		2340.72	95.4239
	2341.68	97.8486		2341.68	98.047		2341.68	95.6149		2341.68	95.4195
	2342.65	97.8676		2342.65	98.0441		2342.65	95.6108		2342.65	95.4743
	2343.61	97.9088		2343.61	98.0278		2343.61	95.6129		2343.61	95.5853
	2344.58	97.9406		2344.58	98.0078		2344.58	95.6103		2344.58	95.6644
	2345.54	97.9754		2345.54	98.0056		2345.54	95.6026		2345.54	95.7491
	2346.51	98.0271		2346.51	98.0233		2346.51	95.6039		2346.51	95.803
	2347.47	98.0572		2347.47	98.0286		2347.47	95.6004		2347.47	95.8297
	2348.43	98.0499		2348.43	98.0233		2348.43	95.5794		2348.43	95.7912
	2349.4	98.0663		2349.4	98.0343		2349.4	95.5527		2349.4	95.7663
	2350.36	98.0757		2350.36	98.0499		2350.36	95.5328		2350.36	95.8083
	2351.33	98.0766		2351.33	98.0613		2351.33	95.5182		2351.33	95.8574
	2352.29	98.0974		2352.29	98.0648		2352.29	95.5106		2352.29	95.8896
	2353.26	98.0988		2353.26	98.0658		2353.26	95.5002		2353.26	95.9061
	2354.22	98.0683		2354.22	98.0877		2354.22	95.4845		2354.22	95.9382
	2355.19	98.0495		2355.19	98.1245		2355.19	95.4612		2355.19	96.1128
	2356.15	98.0427		2356.15	98.1454		2356.15	95.4359		2356.15	96.3764
	2357.11	98.0208		2357.11	98.1607		2357.11	95.4148		2357.11	96.3101
	2358.08	98.0078		2358.08	98.1727		2358.08	95.4003		2358.08	96.2644
	2359.04	98.0095		2359.04	98.1845		2359.04	95.3853		2359.04	96.1468
	2360.01	97.9906		2360.01	98.194		2360.01	95.3704		2360.01	96.0329
	2360.97	97.9585		2360.97	98.2063		2360.97	95.3482		2360.97	95.8757
	2361.94	97.9532		2361.94	98.2277		2361.94	95.3287		2361.94	95.8292
	2362.9	97.9278		2362.9	98.2475		2362.9	95.3123		2362.9	95.8884
	2363.87	97.8948		2363.87	98.2578		2363.87	95.2963		2363.87	95.8985
	2364.83	97.8728		2364.83	98.2505		2364.83	95.2799		2364.83	95.8173
	2365.79	97.837		2365.79	98.2352		2365.79	95.2585		2365.79	95.7219
	2366.76	97.7934		2366.76	98.2202		2366.76	95.2321		2366.76	95.6585
	2367.72	97.7643		2367.72	98.2059		2367.72	95.2117		2367.72	95.6354
	2368.69	97.7312		2368.69	98.1854		2368.69	95.19		2368.69	95.5674
	2369.65	97.6785		2369.65	98.1747		2369.65	95.1674		2369.65	95.4129
	2370.62	97.6277		2370.62	98.1725		2370.62	95.1494		2370.62	95.269
	2371.58	97.5818		2371.58	98.1648		2371.58	95.1325		2371.58	95.1436
	2372.55	97.52		2372.55	98.1316		2372.55	95.1067		2372.55	95.0426
	2373.51	97.4736		2373.51	98.1093		2373.51	95.0851		2373.51	94.9683
	2374.47	97.457		2374.47	98.1075		2374.47	95.0752		2374.47	94.9315
	2375.44	97.421		2375.44	98.0992		2375.44	95.0646		2375.44	94.9021
	2376.4	97.3788		2376.4	98.0839		2376.4	95.0463		2376.4	94.85
	2377.37	97.3484		2377.37	98.0658		2377.37	95.0253		2377.37	94.793
	2378.33	97.3177		2378.33	98.0516		2378.33	95.0002		2378.33	94.7528
	2379.3	97.2868		2379.3	98.0454		2379.3	94.9773		2379.3	94.731
	2380.26	97.2666		2380.26	98.0284		2380.26	94.9615		2380.26	94.7216
	2381.23	97.257		2381.23	98.0071		2381.23	94.9548		2381.23	94.7069
	2382.19	97.2511		2382.19	98.0009		2382.19	94.9494		2382.19	94.6894
	2383.15	97.2556		2383.15	98.0078		2383.15	94.9421		2383.15	94.6805
	2384.12	97.2682		2384.12	98.0212		2384.12	94.9356		2384.12	94.6775
	2385.08	97.2748		2385.08	98.0334		2385.08	94.9324		2385.08	94.6801
	2386.05	97.2835		2386.05	98.0392		2386.05	94.9282		2386.05	94.6943
	2387.01	97.3035		2387.01	98.0426		2387.01	94.9245		2387.01	94.7064
	2387.98	97.334		2387.98	98.0449		2387.98	94.9156		2387.98	94.7217
	2388.94	97.3551		2388.94	98.0494		2388.94	94.9034		2388.94	94.7456
	2389.91	97.4311		2389.91	98.0651		2389.91	94.8958		2389.91	94.8026
	2390.87	97.4049		2390.87	98.064		2390.87	94.8905		2390.87	94.8072
	2391.83	97.4137		2391.83	98.1163		2391.83	94.8944		2391.83	94.8378
	2392.8	97.4146		2392.8	98.1174		2392.8	94.8789		2392.8	94.8382
	2393.76	97.4341		2393.76	98.1872		2393.76	94.8845		2393.76	94.8388
	2394.73	97.421		2394.73	98.0867		2394.73	94.8578		2394.73	94.7766
	2395.69	97.4328		2395.69	98.0981		2395.69	94.8449		2395.69	94.8154
	2396.66	97.4217		2396.66	98.093		2396.66	94.8245		2396.66	94.7239
	2397.62	97.431		2397.62	98.0967		2397.62	94.8145		2397.62	94.7136
	2398.59	97.4267		2398.59	98.0902		2398.59	94.7962		2398.59	94.7155
	2399.55	97.4551		2399.55	98.0598		2399.55	94.7716		2399.55	94.6753
	2400.51	97.4361		2400.51	98.0792		2400.51	94.7267		2400.51	94.5725
	2401.48	97.3893		2401.48	98.1313		2401.48	94.7331		2401.48	94.54
	2402.44	97.4331		2402.44	98.123		2402.44	94.7739		2402.44	94.5638
	2403.41	97.4625		2403.41	98.0783		2403.41	94.8326		2403.41	94.6381
	2404.37	97.4155		2404.37	98.0429		2404.37	94.7308		2404.37	94.6473
	2405.34	97.434		2405.34	98.05		2405.34	94.7013		2405.34	94.5363
	2406.3	97.4243		2406.3	98.0516		2406.3	94.6916		2406.3	94.4607
	2407.27	97.3847		2407.27	98.0112		2407.27	94.6107		2407.27	94.49
	2408.23	97.3521		2408.23	98.0505		2408.23	94.5475		2408.23	94.4787
	2409.19	97.3678		2409.19	98.0505		2409.19	94.5409		2409.19	94.4985
	2410.16	97.4062		2410.16	97.9952		2410.16	94.5901		2410.16	94.4502
	2411.12	97.4105		2411.12	97.9666		2411.12	94.5687		2411.12	94.383
	2412.09	97.3758		2412.09	97.9604		2412.09	94.5091		2412.09	94.3675
	2413.05	97.3968		2413.05	97.9731		2413.05	94.5101		2413.05	94.3778
	2414.02	97.434		2414.02	97.9728		2414.02	94.4771		2414.02	94.3423
	2414.98	97.4216		2414.98	98.0793		2414.98	94.4312		2414.98	94.2596
	2415.95	97.4117		2415.95	98.1092		2415.95	94.4292		2415.95	94.2007
	2416.91	97.4627		2416.91	98.0641		2416.91	94.4689		2416.91	94.2547
	2417.87	97.3934		2417.87	98.086		2417.87	94.4055		2417.87	94.2619
	2418.84	97.3043		2418.84	98.053		2418.84	94.353		2418.84	94.1658
	2419.8	97.305		2419.8	98.1002		2419.8	94.3503		2419.8	94.0883
	2420.77	97.3514		2420.77	98.2132		2420.77	94.3505		2420.77	94.1208
	2421.73	97.4197		2421.73	98.2222		2421.73	94.318		2421.73	94.1321
	2422.7	97.3925		2422.7	98.0811		2422.7	94.2029		2422.7	94.075
	2423.66	97.4234		2423.66	98.0196		2423.66	94.1645		2423.66	94.0563
	2424.63	97.4429		2424.63	98.1286		2424.63	94.193		2424.63	94.0278
	2425.59	97.3706		2425.59	98.1398		2425.59	94.1467		2425.59	93.9891
	2426.55	97.3566		2426.55	98.1251		2426.55	94.1492		2426.55	93.9328
	2427.52	97.3726		2427.52	98.0672		2427.52	94.1372		2427.52	93.9158
	2428.48	97.3454		2428.48	98.0755		2428.48	94.0797		2428.48	93.926
	2429.45	97.364		2429.45	98.1686		2429.45	94.0924		2429.45	93.8398
	2430.41	97.4032		2430.41	98.1572		2430.41	94.1032		2430.41	93.8488
	2431.38	97.3729		2431.38	98.0537		2431.38	94.0128		2431.38	93.8352
	2432.34	97.3241		2432.34	98.0038		2432.34	93.9338		2432.34	93.7824
	2433.31	97.3492		2433.31	98.0566		2433.31	93.9622		2433.31	93.7572
	2434.27	97.4155		2434.27	98.0758		2434.27	94.0097		2434.27	93.7611
	2435.23	97.4227		2435.23	98.1394		2435.23	94.0072		2435.23	93.7057
	2436.2	97.4123		2436.2	98.173		2436.2	94.0133		2436.2	93.6527
	2437.16	97.3751		2437.16	98.1631		2437.16	94.0032		2437.16	93.5874
	2438.13	97.3364		2438.13	98.1453		2438.13	93.9291		2438.13	93.5602
	2439.09	97.3363		2439.09	98.0357		2439.09	93.8068		2439.09	93.5207
	2440.06	97.3281		2440.06	97.9637		2440.06	93.7472		2440.06	93.5119
	2441.02	97.3034		2441.02	98.0246		2441.02	93.7332		2441.02	93.5109
	2441.99	97.2973		2441.99	98.133		2441.99	93.7301		2441.99	93.56
	2442.95	97.3642		2442.95	98.1408		2442.95	93.7309		2442.95	93.5543
	2443.91	97.3998		2443.91	98.0816		2443.91	93.7018		2443.91	93.4853
	2444.88	97.3305		2444.88	98.0232		2444.88	93.6478		2444.88	93.4225
	2445.84	97.3279		2445.84	98.0288		2445.84	93.6369		2445.84	93.4507
	2446.81	97.3667		2446.81	98.0374		2446.81	93.6008		2446.81	93.4782
	2447.77	97.3078		2447.77	98.05		2447.77	93.4697		2447.77	93.4519
	2448.74	97.2905		2448.74	98.099		2448.74	93.4019		2448.74	93.3843
	2449.7	97.3083		2449.7	98.0566		2449.7	93.4047		2449.7	93.2881
	2450.67	97.294		2450.67	98.0007		2450.67	93.3983		2450.67	93.2014
	2451.63	97.3163		2451.63	98.0337		2451.63	93.4102		2451.63	93.1994
	2452.59	97.3468		2452.59	98.071		2452.59	93.3856		2452.59	93.1922
	2453.56	97.335		2453.56	98.0548		2453.56	93.3897		2453.56	93.2438
	2454.52	97.3119		2454.52	98.0266		2454.52	93.324		2454.52	93.1795
	2455.49	97.2824		2455.49	98.0299		2455.49	93.2149		2455.49	93.0605
	2456.45	97.3221		2456.45	98.0861		2456.45	93.2067		2456.45	93.0109
	2457.42	97.3426		2457.42	98.0971		2457.42	93.173		2457.42	93.0042
	2458.38	97.3121		2458.38	98.0624		2458.38	93.1378		2458.38	92.944
	2459.35	97.254		2459.35	98.0377		2459.35	93.091		2459.35	92.915
	2460.31	97.2392		2460.31	98.0255		2460.31	93.0708		2460.31	92.8885
	2461.27	97.2619		2461.27	98.081		2461.27	93.0902		2461.27	92.8635
	2462.24	97.2815		2462.24	98.0724		2462.24	93.0918		2462.24	92.8467
	2463.2	97.2418		2463.2	98.0575		2463.2	93.104		2463.2	92.8732
	2464.17	97.2006		2464.17	98.1113		2464.17	93.0407		2464.17	92.8679
	2465.13	97.197		2465.13	98.0577		2465.13	92.9324		2465.13	92.815
	2466.1	97.2596		2466.1	97.9571		2466.1	92.9299		2466.1	92.7597
	2467.06	97.2798		2467.06	97.9872		2467.06	92.9963		2467.06	92.7275
	2468.03	97.2829		2468.03	98.0191		2468.03	93.0175		2468.03	92.6777
	2468.99	97.2902		2468.99	98.0394		2468.99	92.9747		2468.99	92.617
	2469.95	97.2778		2469.95	98.0924		2469.95	92.9195		2469.95	92.585
	2470.92	97.2244		2470.92	98.0726		2470.92	92.9007		2470.92	92.549
	2471.88	97.183		2471.88	98.0107		2471.88	92.9275		2471.88	92.53
	2472.85	97.1799		2472.85	97.9963		2472.85	92.9117		2472.85	92.5319
	2473.81	97.1838		2473.81	97.9793		2473.81	92.8421		2473.81	92.5316
	2474.78	97.2137		2474.78	97.9996		2474.78	92.8001		2474.78	92.521
[truncated: 1,686 more rows]
